# Supplementary material for: A Simple Preparation of 2,3,4,6-Tetra-O-acyl-Gluco-, Galacto- and Mannopyranoses and Relevant Theoretical Study
Source: MDPI journal article supplement (doi:10.3390/molecules15010374), 2010-01-18
Supplement: s1 [file s1]

# A Simple Preparation of 2,3,4,6-Tetra-*O*-acyl-Gluco-, Galacto- and Mannopyranoses and Relevant Theoretical Study

Zerong Daniel Wang<sup>1,\*</sup>, Yirong Mo<sup>2,\*</sup>, Chiao-Lun Chiou<sup>1,3</sup>, and Minghong Liu<sup>2,4</sup>

<sup>1</sup> Department of Chemistry, School of Science and Computer Engineering, University of Houston-Clear Lake, 2700 Bay Area Boulevard, Houston, TX 77058, USA

<sup>2</sup> Department of Chemistry, Western Michigan University, Kalamazoo, MI 49008, USA

<sup>3</sup> Department of Chemical & Biomolecular Engineering, University of Houston, Houston, TX 77204-4004, USA

<sup>4</sup> ouHoustonHHChemistry Department, University of North Carolina-Charlotte, Charlotte, NC 28223, USA

Structure I-a

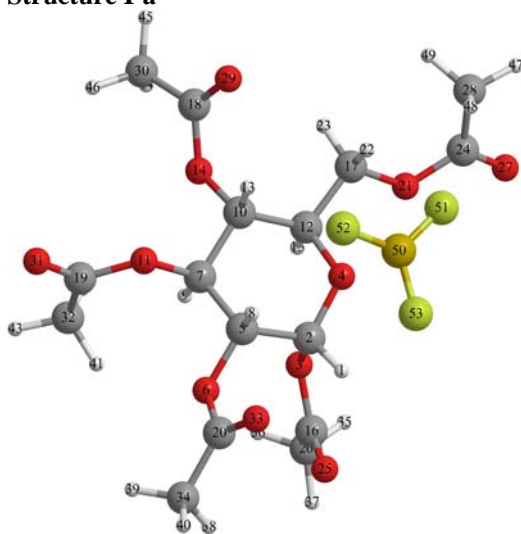

| Bond        | Bond Length (Å) | Bond Angle        | Value (°) | Dihedral Angle          | Value (°) |
|-------------|-----------------|-------------------|-----------|-------------------------|-----------|
| O(4)-B(50)  | 2.44            | F(53)-B(50)-F(52) | 120.15    | H(47)-C(28)-C(24)-O(21) | -175.21   |
| F(51)-B(50) | 1.33            | F(53)-B(50)-F(51) | 119.97    | H(47)-C(28)-C(24)-O(27) | 5.56      |
| F(52)-B(50) | 1.33            | F(52)-B(50)-F(51) | 119.25    | H(48)-C(28)-C(24)-O(21) | 65.54     |
| F(53)-B(50) | 1.32            | H(40)-C(34)-H(39) | 110.48    | H(48)-C(28)-C(24)-O(27) | -113.69   |
| H(38)-C(34) | 1.10            | H(40)-C(34)-H(38) | 109.16    | H(49)-C(28)-C(24)-O(21) | -54.59    |
| H(39)-C(34) | 1.09            | H(40)-C(34)-C(20) | 109.33    | H(49)-C(28)-C(24)-O(27) | 126.18    |
| H(40)-C(34) | 1.09            | H(39)-C(34)-H(38) | 108.20    | O(27)-C(24)-O(21)-C(17) | -176.29   |
| H(41)-C(32) | 1.09            | H(39)-C(34)-C(20) | 111.29    | C(28)-C(24)-O(21)-C(17) | 4.44      |
| H(42)-C(32) | 1.10            | H(38)-C(34)-C(20) | 108.32    | H(38)-C(34)-C(20)-O(6)  | 75.75     |
| H(43)-C(32) | 1.09            | H(43)-C(32)-H(42) | 108.91    | H(38)-C(34)-C(20)-O(33) | -102.78   |

|             |      |                   |        |                         |         |
|-------------|------|-------------------|--------|-------------------------|---------|
| H(44)-C(30) | 1.09 | H(43)-C(32)-H(41) | 109.68 | H(39)-C(34)-C(20)-O(6)  | -43.08  |
| H(45)-C(30) | 1.09 | H(43)-C(32)-C(19) | 107.50 | H(39)-C(34)-C(20)-O(33) | 138.40  |
| H(46)-C(30) | 1.10 | H(42)-C(32)-H(41) | 108.15 | H(40)-C(34)-C(20)-O(6)  | -165.40 |
| H(47)-C(28) | 1.09 | H(42)-C(32)-C(19) | 111.23 | H(40)-C(34)-C(20)-O(33) | 16.07   |
| H(48)-C(28) | 1.10 | H(41)-C(32)-C(19) | 111.35 | H(41)-C(32)-C(19)-O(11) | 56.85   |
| H(49)-C(28) | 1.10 | H(46)-C(30)-H(45) | 109.24 | H(41)-C(32)-C(19)-O(31) | -123.40 |
| H(35)-C(26) | 1.10 | H(46)-C(30)-H(44) | 107.62 | H(42)-C(32)-C(19)-O(11) | -63.86  |
| H(36)-C(26) | 1.09 | H(46)-C(30)-C(18) | 109.24 | H(42)-C(32)-C(19)-O(31) | 115.89  |
| H(37)-C(26) | 1.09 | H(45)-C(30)-H(44) | 110.47 | H(43)-C(32)-C(19)-O(11) | 177.00  |
| O(27)-C(24) | 1.21 | H(45)-C(30)-C(18) | 109.45 | H(43)-C(32)-C(19)-O(31) | -3.26   |
| C(28)-C(24) | 1.52 | H(44)-C(30)-C(18) | 110.79 | H(44)-C(30)-C(18)-O(14) | -46.00  |
| C(24)-O(21) | 1.37 | H(49)-C(28)-H(48) | 107.76 | H(44)-C(30)-C(18)-O(29) | 134.10  |
| O(33)-C(20) | 1.21 | H(49)-C(28)-H(47) | 109.44 | H(45)-C(30)-C(18)-O(14) | -168.05 |
| C(34)-C(20) | 1.50 | H(49)-C(28)-C(24) | 112.12 | H(45)-C(30)-C(18)-O(29) | 12.05   |
| O(31)-C(19) | 1.20 | H(48)-C(28)-H(47) | 109.18 | H(46)-C(30)-C(18)-O(14) | 72.38   |
| C(32)-C(19) | 1.52 | H(48)-C(28)-C(24) | 110.36 | H(46)-C(30)-C(18)-O(29) | -107.51 |
| O(29)-C(18) | 1.21 | H(47)-C(28)-C(24) | 107.95 | C(24)-O(21)-C(17)-C(12) | -163.63 |
| C(30)-C(18) | 1.51 | H(37)-C(26)-H(36) | 110.13 | C(24)-O(21)-C(17)-H(22) | -42.97  |
| O(21)-C(17) | 1.43 | H(37)-C(26)-H(35) | 109.78 | C(24)-O(21)-C(17)-H(23) | 77.82   |
| H(22)-C(17) | 1.09 | H(37)-C(26)-C(16) | 109.42 | H(35)-C(26)-C(16)-O(3)  | 63.92   |
| H(23)-C(17) | 1.09 | H(36)-C(26)-H(35) | 107.44 | H(35)-C(26)-C(16)-O(25) | -115.89 |
| O(25)-C(16) | 1.21 | H(36)-C(26)-C(16) | 110.39 | H(36)-C(26)-C(16)-O(3)  | -54.26  |
| C(26)-C(16) | 1.51 | H(35)-C(26)-C(16) | 109.66 | H(36)-C(26)-C(16)-O(25) | 125.92  |
| C(18)-O(14) | 1.37 | C(28)-C(24)-O(27) | 123.92 | H(37)-C(26)-C(16)-O(3)  | -175.62 |
| H(15)-C(12) | 1.10 | C(28)-C(24)-O(21) | 118.00 | H(37)-C(26)-C(16)-O(25) | 4.57    |
| C(17)-C(12) | 1.52 | O(27)-C(24)-O(21) | 118.08 | O(29)-C(18)-O(14)-C(10) | 9.44    |
| C(19)-O(11) | 1.37 | C(24)-O(21)-C(17) | 122.01 | C(30)-C(18)-O(14)-C(10) | -170.46 |
| H(13)-C(10) | 1.09 | C(34)-C(20)-O(33) | 126.43 | O(21)-C(17)-C(12)-O(4)  | 67.82   |
| O(14)-C(10) | 1.44 | C(34)-C(20)-O(6)  | 110.59 | O(21)-C(17)-C(12)-C(10) | -171.60 |
| C(12)-C(10) | 1.54 | O(33)-C(20)-O(6)  | 122.96 | O(21)-C(17)-C(12)-H(15) | -49.10  |
| H(9)-C(7)   | 1.09 | C(32)-C(19)-O(31) | 123.54 | H(22)-C(17)-C(12)-O(4)  | -54.08  |
| O(11)-C(7)  | 1.43 | C(32)-C(19)-O(11) | 118.71 | H(22)-C(17)-C(12)-C(10) | 66.49   |
| C(10)-C(7)  | 1.53 | O(31)-C(19)-O(11) | 117.74 | H(22)-C(17)-C(12)-H(15) | -171.01 |
| C(20)-O(6)  | 1.38 | C(30)-C(18)-O(29) | 126.09 | H(23)-C(17)-C(12)-O(4)  | -173.25 |
| O(6)-C(5)   | 1.43 | C(30)-C(18)-O(14) | 110.53 | H(23)-C(17)-C(12)-C(10) | -52.67  |
| H(8)-C(5)   | 1.09 | O(29)-C(18)-O(14) | 123.38 | H(23)-C(17)-C(12)-H(15) | 69.83   |
| C(7)-C(5)   | 1.53 | C(26)-C(16)-O(25) | 126.12 | O(31)-C(19)-O(11)-C(7)  | -179.13 |
| C(12)-O(4)  | 1.45 | C(26)-C(16)-O(3)  | 110.33 | C(32)-C(19)-O(11)-C(7)  | 0.62    |
| C(16)-O(3)  | 1.37 | O(25)-C(16)-O(3)  | 123.55 | C(18)-O(14)-C(10)-C(7)  | 136.80  |
| O(3)-C(2)   | 1.43 | H(23)-C(17)-H(22) | 108.45 | C(18)-O(14)-C(10)-C(12) | -103.38 |
| C(5)-C(2)   | 1.54 | H(23)-C(17)-O(21) | 110.02 | C(18)-O(14)-C(10)-H(13) | 18.18   |
| O(4)-C(2)   | 1.41 | H(23)-C(17)-C(12) | 109.44 | O(4)-C(12)-C(10)-C(7)   | -55.15  |
| C(2)-H(1)   | 1.09 | H(22)-C(17)-O(21) | 112.14 | O(4)-C(12)-C(10)-O(14)  | -171.97 |
|             |      | H(22)-C(17)-C(12) | 110.19 | O(4)-C(12)-C(10)-H(13)  | 66.96   |
|             |      | O(21)-C(17)-C(12) | 106.57 | C(17)-C(12)-C(10)-C(7)  | -174.78 |
|             |      | C(18)-O(14)-C(10) | 117.42 | C(17)-C(12)-C(10)-O(14) | 68.40   |
|             |      | H(15)-C(12)-C(17) | 108.51 | C(17)-C(12)-C(10)-H(13) | -52.67  |
|             |      | H(15)-C(12)-C(10) | 109.80 | H(15)-C(12)-C(10)-C(7)  | 63.43   |
|             |      | H(15)-C(12)-O(4)  | 108.40 | H(15)-C(12)-C(10)-O(14) | -53.39  |

|  |  |                   |        |                         |         |
|--|--|-------------------|--------|-------------------------|---------|
|  |  | C(17)-C(12)-C(10) | 113.73 | H(15)-C(12)-C(10)-H(13) | -174.45 |
|  |  | C(17)-C(12)-O(4)  | 107.30 | C(19)-O(11)-C(7)-C(5)   | -110.05 |
|  |  | C(10)-C(12)-O(4)  | 108.96 | C(19)-O(11)-C(7)-C(10)  | 129.91  |
|  |  | C(19)-O(11)-C(7)  | 123.69 | C(19)-O(11)-C(7)-H(9)   | 11.07   |
|  |  | H(13)-C(10)-O(14) | 109.43 | C(12)-C(10)-C(7)-C(5)   | 52.35   |
|  |  | H(13)-C(10)-C(12) | 110.26 | C(12)-C(10)-C(7)-O(11)  | 171.69  |
|  |  | H(13)-C(10)-C(7)  | 110.14 | C(12)-C(10)-C(7)-H(9)   | -67.82  |
|  |  | O(14)-C(10)-C(12) | 110.46 | O(14)-C(10)-C(7)-C(5)   | 172.02  |
|  |  | O(14)-C(10)-C(7)  | 105.78 | O(14)-C(10)-C(7)-O(11)  | -68.64  |
|  |  | C(12)-C(10)-C(7)  | 110.69 | O(14)-C(10)-C(7)-H(9)   | 51.85   |
|  |  | H(9)-C(7)-O(11)   | 111.28 | H(13)-C(10)-C(7)-C(5)   | -69.84  |
|  |  | H(9)-C(7)-C(10)   | 108.70 | H(13)-C(10)-C(7)-O(11)  | 49.50   |
|  |  | H(9)-C(7)-C(5)    | 109.47 | H(13)-C(10)-C(7)-H(9)   | 170.00  |
|  |  | O(11)-C(7)-C(10)  | 107.38 | O(33)-C(20)-O(6)-C(5)   | 3.72    |
|  |  | O(11)-C(7)-C(5)   | 109.45 | C(34)-C(20)-O(6)-C(5)   | -174.87 |
|  |  | C(10)-C(7)-C(5)   | 110.54 | C(20)-O(6)-C(5)-C(2)    | 86.88   |
|  |  | C(20)-O(6)-C(5)   | 115.98 | C(20)-O(6)-C(5)-C(7)    | -151.86 |
|  |  | H(8)-C(5)-C(7)    | 110.15 | C(20)-O(6)-C(5)-H(8)    | -31.92  |
|  |  | H(8)-C(5)-O(6)    | 109.57 | C(10)-C(7)-C(5)-C(2)    | -51.47  |
|  |  | H(8)-C(5)-C(2)    | 108.15 | C(10)-C(7)-C(5)-O(6)    | -172.16 |
|  |  | C(7)-C(5)-O(6)    | 107.92 | C(10)-C(7)-C(5)-H(8)    | 68.26   |
|  |  | C(7)-C(5)-C(2)    | 110.99 | O(11)-C(7)-C(5)-C(2)    | -169.56 |
|  |  | O(6)-C(5)-C(2)    | 110.07 | O(11)-C(7)-C(5)-O(6)    | 69.76   |
|  |  | C(12)-O(4)-C(2)   | 114.68 | O(11)-C(7)-C(5)-H(8)    | -49.82  |
|  |  | C(16)-O(3)-C(2)   | 117.85 | H(9)-C(7)-C(5)-C(2)     | 68.23   |
|  |  | H(1)-C(2)-C(5)    | 111.17 | H(9)-C(7)-C(5)-O(6)     | -52.45  |
|  |  | H(1)-C(2)-O(4)    | 107.19 | H(9)-C(7)-C(5)-H(8)     | -172.03 |
|  |  | H(1)-C(2)-O(3)    | 109.66 | C(10)-C(12)-O(4)-C(2)   | 61.22   |
|  |  | C(5)-C(2)-O(4)    | 110.21 | C(17)-C(12)-O(4)-C(2)   | -175.23 |
|  |  | C(5)-C(2)-O(3)    | 110.15 | H(15)-C(12)-O(4)-C(2)   | -58.24  |
|  |  | O(4)-C(2)-O(3)    | 108.37 | O(25)-C(16)-O(3)-C(2)   | 6.25    |
|  |  |                   |        | C(26)-C(16)-O(3)-C(2)   | -173.57 |
|  |  |                   |        | C(16)-O(3)-C(2)-O(4)    | 137.03  |
|  |  |                   |        | C(16)-O(3)-C(2)-C(5)    | -102.34 |
|  |  |                   |        | C(16)-O(3)-C(2)-H(1)    | 20.32   |
|  |  |                   |        | O(6)-C(5)-C(2)-O(3)     | 54.44   |
|  |  |                   |        | O(6)-C(5)-C(2)-O(4)     | 173.97  |
|  |  |                   |        | O(6)-C(5)-C(2)-H(1)     | -67.33  |
|  |  |                   |        | C(7)-C(5)-C(2)-O(3)     | -64.97  |
|  |  |                   |        | C(7)-C(5)-C(2)-O(4)     | 54.56   |
|  |  |                   |        | C(7)-C(5)-C(2)-H(1)     | 173.26  |
|  |  |                   |        | H(8)-C(5)-C(2)-O(3)     | 174.10  |
|  |  |                   |        | H(8)-C(5)-C(2)-O(4)     | -66.37  |
|  |  |                   |        | H(8)-C(5)-C(2)-H(1)     | 52.33   |
|  |  |                   |        | C(12)-O(4)-C(2)-O(3)    | 59.73   |
|  |  |                   |        | C(12)-O(4)-C(2)-C(5)    | -60.88  |
|  |  |                   |        | C(12)-O(4)-C(2)-H(1)    | 178.02  |

Structure I-b

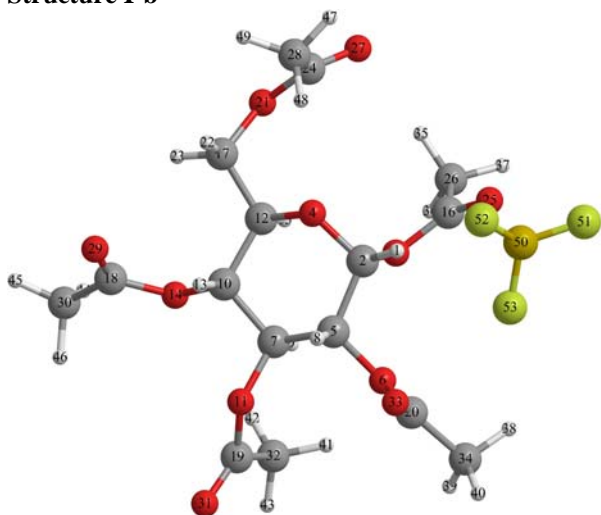

| Bond        | Bond Length (Å) | Bond Angle        | Value (°) | Dihedral Angle          | Value (°) |
|-------------|-----------------|-------------------|-----------|-------------------------|-----------|
| F(51)-B(50) | 1.34            | F(51)-B(50)-F(52) | 116.96    | H(49)-C(28)-C(24)-O(21) | -45.31    |
| F(52)-B(50) | 1.36            | F(51)-B(50)-F(53) | 116.31    | H(49)-C(28)-C(24)-O(27) | 131.25    |
| F(53)-B(50) | 1.37            | F(52)-B(50)-F(53) | 114.95    | H(48)-C(28)-C(24)-O(21) | 75.15     |
| H(38)-C(34) | 1.09            | H(38)-C(34)-H(39) | 108.35    | H(48)-C(28)-C(24)-O(27) | -108.29   |
| H(39)-C(34) | 1.09            | H(38)-C(34)-H(40) | 109.36    | H(47)-C(28)-C(24)-O(21) | -165.96   |
| H(40)-C(34) | 1.09            | H(38)-C(34)-C(20) | 107.91    | H(47)-C(28)-C(24)-O(27) | 10.60     |
| H(41)-C(32) | 1.09            | H(39)-C(34)-H(40) | 110.53    | C(28)-C(24)-O(21)-C(17) | -33.60    |
| H(42)-C(32) | 1.10            | H(39)-C(34)-C(20) | 111.33    | O(27)-C(24)-O(21)-C(17) | 149.63    |
| H(43)-C(32) | 1.09            | H(40)-C(34)-C(20) | 109.31    | H(40)-C(34)-C(20)-O(6)  | -164.48   |
| H(44)-C(30) | 1.09            | H(41)-C(32)-H(42) | 108.17    | H(40)-C(34)-C(20)-O(33) | 16.52     |
| H(45)-C(30) | 1.09            | H(41)-C(32)-H(43) | 109.62    | H(39)-C(34)-C(20)-O(6)  | -42.09    |
| H(46)-C(30) | 1.10            | H(41)-C(32)-C(19) | 111.46    | H(39)-C(34)-C(20)-O(33) | 138.91    |
| H(47)-C(28) | 1.09            | H(42)-C(32)-H(43) | 108.87    | H(38)-C(34)-C(20)-O(6)  | 76.69     |
| H(48)-C(28) | 1.09            | H(42)-C(32)-C(19) | 111.20    | H(38)-C(34)-C(20)-O(33) | -102.32   |
| H(49)-C(28) | 1.10            | H(43)-C(32)-C(19) | 107.48    | H(43)-C(32)-C(19)-O(11) | 175.69    |
| H(35)-C(26) | 1.10            | H(44)-C(30)-H(45) | 110.45    | H(43)-C(32)-C(19)-O(31) | -4.11     |
| H(36)-C(26) | 1.09            | H(44)-C(30)-H(46) | 107.60    | H(42)-C(32)-C(19)-O(11) | -65.25    |
| H(37)-C(26) | 1.09            | H(44)-C(30)-C(18) | 110.79    | H(42)-C(32)-C(19)-O(31) | 114.95    |
| O(27)-C(24) | 1.21            | H(45)-C(30)-H(46) | 109.29    | H(41)-C(32)-C(19)-O(11) | 55.55     |
| C(28)-C(24) | 1.51            | H(45)-C(30)-C(18) | 109.44    | H(41)-C(32)-C(19)-O(31) | -124.25   |
| C(24)-O(21) | 1.37            | H(46)-C(30)-C(18) | 109.24    | H(46)-C(30)-C(18)-O(14) | 72.23     |
| O(33)-C(20) | 1.20            | H(47)-C(28)-H(48) | 108.79    | H(46)-C(30)-C(18)-O(29) | -107.50   |
| C(34)-C(20) | 1.50            | H(47)-C(28)-H(49) | 109.75    | H(45)-C(30)-C(18)-O(14) | -168.16   |
| O(31)-C(19) | 1.20            | H(47)-C(28)-C(24) | 108.05    | H(45)-C(30)-C(18)-O(29) | 12.11     |
| C(32)-C(19) | 1.52            | H(48)-C(28)-H(49) | 108.32    | H(44)-C(30)-C(18)-O(14) | -46.13    |
| O(29)-C(18) | 1.21            | H(48)-C(28)-C(24) | 110.46    | H(44)-C(30)-C(18)-O(29) | 134.14    |
| C(30)-C(18) | 1.51            | H(49)-C(28)-C(24) | 111.43    | C(24)-O(21)-C(17)-C(12) | -85.96    |
| O(21)-C(17) | 1.43            | H(35)-C(26)-H(36) | 108.46    | C(24)-O(21)-C(17)-H(23) | 155.58    |
| H(22)-C(17) | 1.09            | H(35)-C(26)-H(37) | 108.89    | C(24)-O(21)-C(17)-H(22) | 36.89     |
| H(23)-C(17) | 1.09            | H(35)-C(26)-C(16) | 106.85    | H(37)-C(26)-C(16)-O(3)  | -154.96   |
| O(25)-C(16) | 1.23            | H(36)-C(26)-H(37) | 111.28    | H(37)-C(26)-C(16)-O(25) | 27.09     |
| C(26)-C(16) | 1.50            | H(36)-C(26)-C(16) | 111.08    | H(36)-C(26)-C(16)-O(3)  | -31.19    |

|             |      |                   |        |                         |         |
|-------------|------|-------------------|--------|-------------------------|---------|
| C(18)-O(14) | 1.37 | H(37)-C(26)-C(16) | 110.16 | H(36)-C(26)-C(16)-O(25) | 150.85  |
| H(15)-C(12) | 1.10 | O(27)-C(24)-C(28) | 123.87 | H(35)-C(26)-C(16)-O(3)  | 86.92   |
| C(17)-C(12) | 1.52 | O(27)-C(24)-O(21) | 117.89 | H(35)-C(26)-C(16)-O(25) | -91.04  |
| C(19)-O(11) | 1.37 | C(28)-C(24)-O(21) | 118.15 | C(30)-C(18)-O(14)-C(10) | -170.88 |
| H(13)-C(10) | 1.09 | C(24)-O(21)-C(17) | 122.26 | O(29)-C(18)-O(14)-C(10) | 8.86    |
| O(14)-C(10) | 1.44 | O(33)-C(20)-C(34) | 126.63 | H(23)-C(17)-C(12)-O(4)  | -171.09 |
| C(12)-C(10) | 1.53 | O(33)-C(20)-O(6)  | 122.97 | H(23)-C(17)-C(12)-C(10) | -49.87  |
| H(9)-C(7)   | 1.09 | C(34)-C(20)-O(6)  | 110.40 | H(23)-C(17)-C(12)-H(15) | 72.64   |
| O(11)-C(7)  | 1.43 | O(31)-C(19)-C(32) | 123.65 | H(22)-C(17)-C(12)-O(4)  | -50.02  |
| C(10)-C(7)  | 1.53 | O(31)-C(19)-O(11) | 117.68 | H(22)-C(17)-C(12)-C(10) | 71.19   |
| C(20)-O(6)  | 1.38 | C(32)-C(19)-O(11) | 118.67 | H(22)-C(17)-C(12)-H(15) | -166.29 |
| O(6)-C(5)   | 1.43 | O(29)-C(18)-C(30) | 126.20 | O(21)-C(17)-C(12)-O(4)  | 73.74   |
| H(8)-C(5)   | 1.09 | O(29)-C(18)-O(14) | 123.12 | O(21)-C(17)-C(12)-C(10) | -165.04 |
| C(7)-C(5)   | 1.53 | C(30)-C(18)-O(14) | 110.68 | O(21)-C(17)-C(12)-H(15) | -42.52  |
| C(12)-O(4)  | 1.44 | O(25)-C(16)-C(26) | 121.20 | C(32)-C(19)-O(11)-C(7)  | 3.85    |
| C(16)-O(3)  | 1.33 | O(25)-C(16)-O(3)  | 125.51 | O(31)-C(19)-O(11)-C(7)  | -176.34 |
| O(3)-C(2)   | 1.46 | C(26)-C(16)-O(3)  | 113.25 | C(18)-O(14)-C(10)-C(7)  | 143.93  |
| C(5)-C(2)   | 1.53 | O(21)-C(17)-H(22) | 112.81 | C(18)-O(14)-C(10)-C(12) | -98.55  |
| O(4)-C(2)   | 1.40 | O(21)-C(17)-H(23) | 105.94 | C(18)-O(14)-C(10)-H(13) | 24.39   |
| C(2)-H(1)   | 1.09 | O(21)-C(17)-C(12) | 107.10 | O(4)-C(12)-C(10)-C(7)   | -60.13  |
|             |      | H(22)-C(17)-H(23) | 108.60 | O(4)-C(12)-C(10)-O(14)  | -176.11 |
|             |      | H(22)-C(17)-C(12) | 111.34 | O(4)-C(12)-C(10)-H(13)  | 61.78   |
|             |      | H(23)-C(17)-C(12) | 110.92 | C(17)-C(12)-C(10)-C(7)  | 179.96  |
|             |      | C(18)-O(14)-C(10) | 116.98 | C(17)-C(12)-C(10)-O(14) | 63.99   |
|             |      | H(15)-C(12)-C(17) | 106.59 | C(17)-C(12)-C(10)-H(13) | -58.13  |
|             |      | H(15)-C(12)-C(10) | 108.64 | H(15)-C(12)-C(10)-C(7)  | 58.49   |
|             |      | H(15)-C(12)-O(4)  | 109.34 | H(15)-C(12)-C(10)-O(14) | -57.49  |
|             |      | C(17)-C(12)-C(10) | 118.14 | H(15)-C(12)-C(10)-H(13) | -179.60 |
|             |      | C(17)-C(12)-O(4)  | 105.68 | C(19)-O(11)-C(7)-C(5)   | -115.04 |
|             |      | C(10)-C(12)-O(4)  | 108.21 | C(19)-O(11)-C(7)-C(10)  | 124.43  |
|             |      | C(19)-O(11)-C(7)  | 123.69 | C(19)-O(11)-C(7)-H(9)   | 5.50    |
|             |      | H(13)-C(10)-O(14) | 109.49 | C(12)-C(10)-C(7)-C(5)   | 53.88   |
|             |      | H(13)-C(10)-C(12) | 110.93 | C(12)-C(10)-C(7)-O(11)  | 172.82  |
|             |      | H(13)-C(10)-C(7)  | 110.85 | C(12)-C(10)-C(7)-H(9)   | -66.43  |
|             |      | O(14)-C(10)-C(12) | 111.22 | O(14)-C(10)-C(7)-C(5)   | 173.28  |
|             |      | O(14)-C(10)-C(7)  | 105.86 | O(14)-C(10)-C(7)-O(11)  | -67.78  |
|             |      | C(12)-C(10)-C(7)  | 108.38 | O(14)-C(10)-C(7)-H(9)   | 52.97   |
|             |      | H(9)-C(7)-O(11)   | 111.33 | H(13)-C(10)-C(7)-C(5)   | -68.08  |
|             |      | H(9)-C(7)-C(10)   | 108.43 | H(13)-C(10)-C(7)-O(11)  | 50.86   |
|             |      | H(9)-C(7)-C(5)    | 109.45 | H(13)-C(10)-C(7)-H(9)   | 171.62  |
|             |      | O(11)-C(7)-C(10)  | 108.01 | C(34)-C(20)-O(6)-C(5)   | -176.23 |
|             |      | O(11)-C(7)-C(5)   | 108.56 | O(33)-C(20)-O(6)-C(5)   | 2.81    |
|             |      | C(10)-C(7)-C(5)   | 111.07 | C(20)-O(6)-C(5)-C(2)    | 100.71  |
|             |      | C(20)-O(6)-C(5)   | 116.40 | C(20)-O(6)-C(5)-C(7)    | -135.16 |
|             |      | O(6)-C(5)-H(8)    | 109.11 | C(20)-O(6)-C(5)-H(8)    | -16.42  |
|             |      | O(6)-C(5)-C(7)    | 108.45 | C(10)-C(7)-C(5)-C(2)    | -47.94  |
|             |      | O(6)-C(5)-C(2)    | 110.89 | C(10)-C(7)-C(5)-H(8)    | 70.22   |
|             |      | H(8)-C(5)-C(7)    | 109.12 | C(10)-C(7)-C(5)-O(6)    | -171.04 |
|             |      | H(8)-C(5)-C(2)    | 106.61 | O(11)-C(7)-C(5)-C(2)    | -166.55 |

|  |  |                 |        |                       |         |
|--|--|-----------------|--------|-----------------------|---------|
|  |  | C(7)-C(5)-C(2)  | 112.61 | O(11)-C(7)-C(5)-H(8)  | -48.39  |
|  |  | C(12)-O(4)-C(2) | 115.22 | O(11)-C(7)-C(5)-O(6)  | 70.35   |
|  |  | C(16)-O(3)-C(2) | 121.22 | H(9)-C(7)-C(5)-C(2)   | 71.75   |
|  |  | O(3)-C(2)-C(5)  | 109.35 | H(9)-C(7)-C(5)-H(8)   | -170.08 |
|  |  | O(3)-C(2)-O(4)  | 107.43 | H(9)-C(7)-C(5)-O(6)   | -51.34  |
|  |  | O(3)-C(2)-H(1)  | 110.34 | C(10)-C(12)-O(4)-C(2) | 64.84   |
|  |  | C(5)-C(2)-O(4)  | 110.89 | C(17)-C(12)-O(4)-C(2) | -167.70 |
|  |  | C(5)-C(2)-H(1)  | 111.88 | H(15)-C(12)-O(4)-C(2) | -53.33  |
|  |  | O(4)-C(2)-H(1)  | 106.83 | C(26)-C(16)-O(3)-C(2) | -146.24 |
|  |  |                 |        | O(25)-C(16)-O(3)-C(2) | 31.61   |
|  |  |                 |        | C(16)-O(3)-C(2)-H(1)  | -26.31  |
|  |  |                 |        | C(16)-O(3)-C(2)-O(4)  | 89.79   |
|  |  |                 |        | C(16)-O(3)-C(2)-C(5)  | -149.78 |
|  |  |                 |        | C(7)-C(5)-C(2)-H(1)   | 167.09  |
|  |  |                 |        | C(7)-C(5)-C(2)-O(4)   | 47.93   |
|  |  |                 |        | C(7)-C(5)-C(2)-O(3)   | -70.36  |
|  |  |                 |        | H(8)-C(5)-C(2)-H(1)   | 47.46   |
|  |  |                 |        | H(8)-C(5)-C(2)-O(4)   | -71.70  |
|  |  |                 |        | H(8)-C(5)-C(2)-O(3)   | 170.01  |
|  |  |                 |        | O(6)-C(5)-C(2)-H(1)   | -71.19  |
|  |  |                 |        | O(6)-C(5)-C(2)-O(4)   | 169.65  |
|  |  |                 |        | O(6)-C(5)-C(2)-O(3)   | 51.37   |
|  |  |                 |        | C(12)-O(4)-C(2)-H(1)  | -179.87 |
|  |  |                 |        | C(12)-O(4)-C(2)-C(5)  | -57.72  |
|  |  |                 |        | C(12)-O(4)-C(2)-O(3)  | 61.73   |

Structure II

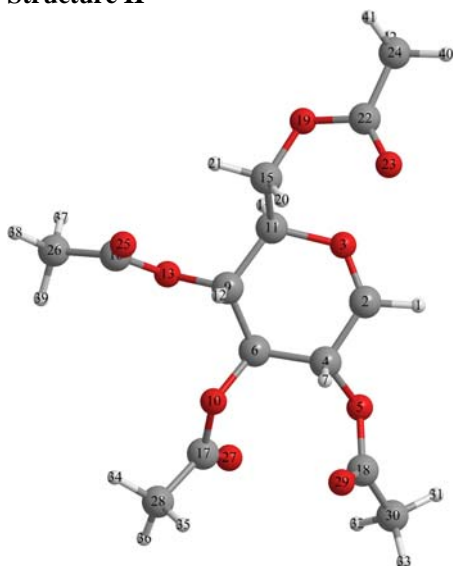

| Bond        | Bond Length (Å) | Bond Angle        | Value (°) | Dihedral Angle          | Value (°) |
|-------------|-----------------|-------------------|-----------|-------------------------|-----------|
| H(31)-C(30) | 1.09            | H(31)-C(30)-H(32) | 107.80    | H(42)-C(24)-C(22)-O(19) | -48.68    |
| H(32)-C(30) | 1.10            | H(31)-C(30)-H(33) | 110.72    | H(42)-C(24)-C(22)-O(23) | 131.85    |
| H(33)-C(30) | 1.09            | H(31)-C(30)-C(18) | 110.88    | H(41)-C(24)-C(22)-O(19) | 69.33     |
| H(34)-C(28) | 1.09            | H(32)-C(30)-H(33) | 109.74    | H(41)-C(24)-C(22)-O(23) | -110.13   |

|             |      |                   |        |                         |         |
|-------------|------|-------------------|--------|-------------------------|---------|
| H(35)-C(28) | 1.10 | H(32)-C(30)-C(18) | 108.16 | H(40)-C(24)-C(22)-O(19) | -170.78 |
| H(36)-C(28) | 1.09 | H(33)-C(30)-C(18) | 109.49 | H(40)-C(24)-C(22)-O(23) | 9.75    |
| H(37)-C(26) | 1.09 | H(34)-C(28)-H(35) | 107.49 | C(24)-C(22)-O(19)-C(15) | -172.70 |
| H(38)-C(26) | 1.09 | H(34)-C(28)-H(36) | 110.51 | O(23)-C(22)-O(19)-C(15) | 6.80    |
| H(39)-C(26) | 1.10 | H(34)-C(28)-C(17) | 110.87 | H(33)-C(30)-C(18)-O(5)  | 168.19  |
| H(40)-C(24) | 1.09 | H(35)-C(28)-H(36) | 109.53 | H(33)-C(30)-C(18)-O(29) | -13.59  |
| H(41)-C(24) | 1.10 | H(35)-C(28)-C(17) | 109.03 | H(32)-C(30)-C(18)-O(5)  | -72.28  |
| H(42)-C(24) | 1.09 | H(36)-C(28)-C(17) | 109.37 | H(32)-C(30)-C(18)-O(29) | 105.94  |
| O(23)-C(22) | 1.21 | H(37)-C(26)-H(38) | 110.17 | H(31)-C(30)-C(18)-O(5)  | 45.72   |
| C(24)-C(22) | 1.50 | H(37)-C(26)-H(39) | 107.32 | H(31)-C(30)-C(18)-O(29) | -136.06 |
| C(22)-O(19) | 1.38 | H(37)-C(26)-C(16) | 110.32 | H(36)-C(28)-C(17)-O(10) | 171.03  |
| O(29)-C(18) | 1.20 | H(38)-C(26)-H(39) | 109.88 | H(36)-C(28)-C(17)-O(27) | -10.57  |
| C(30)-C(18) | 1.50 | H(38)-C(26)-C(16) | 109.29 | H(35)-C(28)-C(17)-O(10) | -69.22  |
| O(27)-C(17) | 1.21 | H(39)-C(26)-C(16) | 109.85 | H(35)-C(28)-C(17)-O(27) | 109.17  |
| C(28)-C(17) | 1.50 | H(40)-C(24)-H(41) | 109.42 | H(34)-C(28)-C(17)-O(10) | 48.93   |
| O(25)-C(16) | 1.21 | H(40)-C(24)-H(42) | 110.53 | H(34)-C(28)-C(17)-O(27) | -132.68 |
| C(26)-C(16) | 1.50 | H(40)-C(24)-C(22) | 109.51 | H(39)-C(26)-C(16)-O(13) | 63.08   |
| O(19)-C(15) | 1.42 | H(41)-C(24)-H(42) | 107.31 | H(39)-C(26)-C(16)-O(25) | -117.41 |
| H(20)-C(15) | 1.09 | H(41)-C(24)-C(22) | 109.36 | H(38)-C(26)-C(16)-O(13) | -176.30 |
| H(21)-C(15) | 1.09 | H(42)-C(24)-C(22) | 110.68 | H(38)-C(26)-C(16)-O(25) | 3.20    |
| C(16)-O(13) | 1.39 | O(23)-C(22)-C(24) | 127.10 | H(37)-C(26)-C(16)-O(13) | -55.03  |
| H(14)-C(11) | 1.09 | O(23)-C(22)-O(19) | 122.18 | H(37)-C(26)-C(16)-O(25) | 124.48  |
| C(15)-C(11) | 1.53 | C(24)-C(22)-O(19) | 110.72 | C(22)-O(19)-C(15)-C(11) | -95.71  |
| C(17)-O(10) | 1.39 | C(22)-O(19)-C(15) | 116.16 | C(22)-O(19)-C(15)-H(21) | 146.54  |
| H(12)-C(9)  | 1.10 | O(29)-C(18)-C(30) | 128.63 | C(22)-O(19)-C(15)-H(20) | 27.58   |
| O(13)-C(9)  | 1.43 | O(29)-C(18)-O(5)  | 120.76 | C(26)-C(16)-O(13)-C(9)  | -173.35 |
| C(11)-C(9)  | 1.54 | C(30)-C(18)-O(5)  | 110.59 | O(25)-C(16)-O(13)-C(9)  | 7.11    |
| H(8)-C(6)   | 1.09 | O(27)-C(17)-C(28) | 127.57 | H(21)-C(15)-C(11)-O(3)  | 178.96  |
| O(10)-C(6)  | 1.42 | O(27)-C(17)-O(10) | 122.07 | H(21)-C(15)-C(11)-C(9)  | -57.02  |
| C(9)-C(6)   | 1.53 | C(28)-C(17)-O(10) | 110.34 | H(21)-C(15)-C(11)-H(14) | 69.52   |
| C(18)-O(5)  | 1.40 | O(25)-C(16)-C(26) | 127.65 | H(20)-C(15)-C(11)-O(3)  | -62.41  |
| O(5)-C(4)   | 1.42 | O(25)-C(16)-O(13) | 121.88 | H(20)-C(15)-C(11)-C(9)  | 61.61   |
| H(7)-C(4)   | 1.11 | C(26)-C(16)-O(13) | 110.48 | H(20)-C(15)-C(11)-H(14) | -171.85 |
| C(6)-C(4)   | 1.54 | O(19)-C(15)-H(20) | 110.76 | O(19)-C(15)-C(11)-O(3)  | 61.27   |
| C(11)-O(3)  | 1.51 | O(19)-C(15)-H(21) | 107.37 | O(19)-C(15)-C(11)-C(9)  | -174.72 |
| C(4)-C(2)   | 1.48 | O(19)-C(15)-C(11) | 111.99 | O(19)-C(15)-C(11)-H(14) | -48.17  |
| O(3)-C(2)   | 1.25 | H(20)-C(15)-H(21) | 109.04 | C(28)-C(17)-O(10)-C(6)  | -179.03 |
| C(2)-H(1)   | 1.09 | H(20)-C(15)-C(11) | 110.07 | O(27)-C(17)-O(10)-C(6)  | 2.47    |
|             |      | H(21)-C(15)-C(11) | 107.47 | C(16)-O(13)-C(9)-C(6)   | 136.02  |
|             |      | C(16)-O(13)-C(9)  | 116.72 | C(16)-O(13)-C(9)-C(11)  | -100.92 |
|             |      | H(14)-C(11)-C(15) | 111.36 | C(16)-O(13)-C(9)-H(12)  | 17.90   |
|             |      | H(14)-C(11)-C(9)  | 111.23 | O(3)-C(11)-C(9)-C(6)    | -29.95  |
|             |      | H(14)-C(11)-O(3)  | 101.60 | O(3)-C(11)-C(9)-O(13)   | -148.40 |
|             |      | C(15)-C(11)-C(9)  | 113.61 | O(3)-C(11)-C(9)-H(12)   | 93.15   |
|             |      | C(15)-C(11)-O(3)  | 105.53 | C(15)-C(11)-C(9)-C(6)   | -149.96 |
|             |      | C(9)-C(11)-O(3)   | 112.74 | C(15)-C(11)-C(9)-O(13)  | 91.60   |
|             |      | C(17)-O(10)-C(6)  | 117.40 | C(15)-C(11)-C(9)-H(12)  | -26.85  |
|             |      | H(12)-C(9)-O(13)  | 109.15 | H(14)-C(11)-C(9)-C(6)   | 83.43   |
|             |      | H(12)-C(9)-C(11)  | 109.73 | H(14)-C(11)-C(9)-O(13)  | -35.02  |

|  |  |                  |        |                        |         |
|--|--|------------------|--------|------------------------|---------|
|  |  | H(12)-C(9)-C(6)  | 109.26 | H(14)-C(11)-C(9)-H(12) | -153.47 |
|  |  | O(13)-C(9)-C(11) | 107.27 | C(17)-O(10)-C(6)-C(4)  | -93.52  |
|  |  | O(13)-C(9)-C(6)  | 107.00 | C(17)-O(10)-C(6)-C(9)  | 147.42  |
|  |  | C(11)-C(9)-C(6)  | 114.29 | C(17)-O(10)-C(6)-H(8)  | 26.76   |
|  |  | H(8)-C(6)-O(10)  | 110.14 | C(11)-C(9)-C(6)-C(4)   | 51.37   |
|  |  | H(8)-C(6)-C(9)   | 111.65 | C(11)-C(9)-C(6)-O(10)  | 170.48  |
|  |  | H(8)-C(6)-C(4)   | 108.94 | C(11)-C(9)-C(6)-H(8)   | -69.85  |
|  |  | O(10)-C(6)-C(9)  | 105.56 | O(13)-C(9)-C(6)-C(4)   | 169.96  |
|  |  | O(10)-C(6)-C(4)  | 110.31 | O(13)-C(9)-C(6)-O(10)  | -70.93  |
|  |  | C(9)-C(6)-C(4)   | 110.23 | O(13)-C(9)-C(6)-H(8)   | 48.74   |
|  |  | C(18)-O(5)-C(4)  | 114.75 | H(12)-C(9)-C(6)-C(4)   | -71.99  |
|  |  | O(5)-C(4)-H(7)   | 108.86 | H(12)-C(9)-C(6)-O(10)  | 47.12   |
|  |  | O(5)-C(4)-C(6)   | 113.26 | H(12)-C(9)-C(6)-H(8)   | 166.79  |
|  |  | O(5)-C(4)-C(2)   | 104.38 | C(30)-C(18)-O(5)-C(4)  | 173.18  |
|  |  | H(7)-C(4)-C(6)   | 108.94 | O(29)-C(18)-O(5)-C(4)  | -5.20   |
|  |  | H(7)-C(4)-C(2)   | 109.10 | C(18)-O(5)-C(4)-C(2)   | 138.86  |
|  |  | C(6)-C(4)-C(2)   | 112.15 | C(18)-O(5)-C(4)-C(6)   | -98.87  |
|  |  | C(11)-O(3)-C(2)  | 124.59 | C(18)-O(5)-C(4)-H(7)   | 22.47   |
|  |  | C(4)-C(2)-O(3)   | 125.45 | C(9)-C(6)-C(4)-C(2)    | -45.00  |
|  |  | C(4)-C(2)-H(1)   | 119.92 | C(9)-C(6)-C(4)-H(7)    | 75.87   |
|  |  | O(3)-C(2)-H(1)   | 114.58 | C(9)-C(6)-C(4)-O(5)    | -162.83 |
|  |  |                  |        | O(10)-C(6)-C(4)-C(2)   | -161.17 |
|  |  |                  |        | O(10)-C(6)-C(4)-H(7)   | -40.30  |
|  |  |                  |        | O(10)-C(6)-C(4)-O(5)   | 80.99   |
|  |  |                  |        | H(8)-C(6)-C(4)-C(2)    | 77.83   |
|  |  |                  |        | H(8)-C(6)-C(4)-H(7)    | -161.30 |
|  |  |                  |        | H(8)-C(6)-C(4)-O(5)    | -40.01  |
|  |  |                  |        | C(9)-C(11)-O(3)-C(2)   | 1.58    |
|  |  |                  |        | C(15)-C(11)-O(3)-C(2)  | 126.14  |
|  |  |                  |        | H(14)-C(11)-O(3)-C(2)  | -117.56 |
|  |  |                  |        | C(6)-C(4)-C(2)-H(1)    | -158.09 |
|  |  |                  |        | C(6)-C(4)-C(2)-O(3)    | 19.13   |
|  |  |                  |        | H(7)-C(4)-C(2)-H(1)    | 81.14   |
|  |  |                  |        | H(7)-C(4)-C(2)-O(3)    | -101.64 |
|  |  |                  |        | O(5)-C(4)-C(2)-H(1)    | -35.09  |
|  |  |                  |        | O(5)-C(4)-C(2)-O(3)    | 142.13  |
|  |  |                  |        | C(11)-O(3)-C(2)-H(1)   | -178.89 |
|  |  |                  |        | C(11)-O(3)-C(2)-C(4)   | 3.76    |



Structure III-a

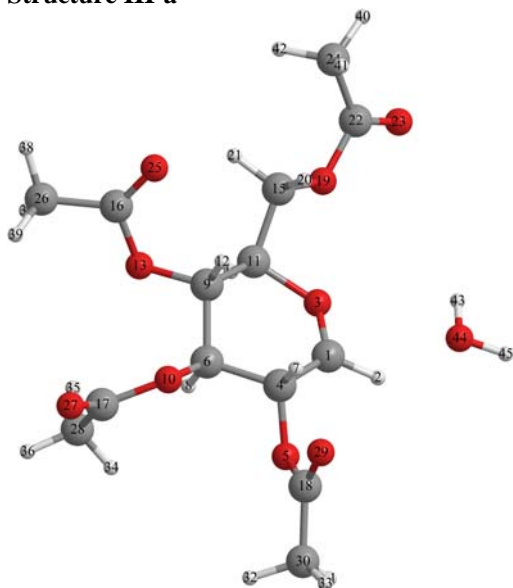

| Bond        | Bond Length (Å) | Bond Angle        | Value (°) | Dihedral Angle          | Value (°) |
|-------------|-----------------|-------------------|-----------|-------------------------|-----------|
| H(45)-O(44) | 0.97            | H(45)-O(44)-H(43) | 104.78    | H(42)-C(24)-C(22)-O(19) | -58.77    |
| O(44)-H(43) | 0.97            | H(31)-C(30)-H(32) | 107.63    | H(42)-C(24)-C(22)-O(23) | 120.34    |
| H(31)-C(30) | 1.09            | H(31)-C(30)-H(33) | 110.53    | H(41)-C(24)-C(22)-O(19) | 61.56     |
| H(32)-C(30) | 1.10            | H(31)-C(30)-C(18) | 110.54    | H(41)-C(24)-C(22)-O(23) | -119.33   |
| H(33)-C(30) | 1.09            | H(32)-C(30)-H(33) | 109.45    | H(40)-C(24)-C(22)-O(19) | -178.55   |
| H(34)-C(28) | 1.10            | H(32)-C(30)-C(18) | 109.40    | H(40)-C(24)-C(22)-O(23) | 0.56      |
| H(35)-C(28) | 1.09            | H(33)-C(30)-C(18) | 109.25    | C(24)-C(22)-O(19)-C(15) | -10.67    |
| H(36)-C(28) | 1.09            | H(34)-C(28)-H(35) | 108.42    | O(23)-C(22)-O(19)-C(15) | 170.14    |
| H(37)-C(26) | 1.09            | H(34)-C(28)-H(36) | 109.00    | H(33)-C(30)-C(18)-O(5)  | 171.27    |
| H(38)-C(26) | 1.09            | H(34)-C(28)-C(17) | 111.66    | H(33)-C(30)-C(18)-O(29) | -8.81     |
| H(39)-C(26) | 1.10            | H(35)-C(28)-H(36) | 108.87    | H(32)-C(30)-C(18)-O(5)  | -68.93    |
| H(40)-C(24) | 1.09            | H(35)-C(28)-C(17) | 111.34    | H(32)-C(30)-C(18)-O(29) | 110.99    |
| H(41)-C(24) | 1.10            | H(36)-C(28)-C(17) | 107.49    | H(31)-C(30)-C(18)-O(5)  | 49.42     |
| H(42)-C(24) | 1.10            | H(37)-C(26)-H(38) | 110.52    | H(31)-C(30)-C(18)-O(29) | -130.65   |
| O(23)-C(22) | 1.20            | H(37)-C(26)-H(39) | 107.73    | H(36)-C(28)-C(17)-O(10) | 174.02    |
| C(24)-C(22) | 1.51            | H(37)-C(26)-C(16) | 110.94    | H(36)-C(28)-C(17)-O(27) | -4.07     |
| C(22)-O(19) | 1.39            | H(38)-C(26)-H(39) | 109.17    | H(35)-C(28)-C(17)-O(10) | -66.83    |
| O(29)-C(18) | 1.20            | H(38)-C(26)-C(16) | 109.34    | H(35)-C(28)-C(17)-O(27) | 115.09    |
| C(30)-C(18) | 1.50            | H(39)-C(26)-C(16) | 109.11    | H(34)-C(28)-C(17)-O(10) | 54.52     |
| O(27)-C(17) | 1.20            | H(40)-C(24)-H(41) | 108.98    | H(34)-C(28)-C(17)-O(27) | -123.57   |
| C(28)-C(17) | 1.51            | H(40)-C(24)-H(42) | 109.10    | H(39)-C(26)-C(16)-O(13) | 72.68     |
| O(25)-C(16) | 1.21            | H(40)-C(24)-C(22) | 108.17    | H(39)-C(26)-C(16)-O(25) | -106.94   |
| C(26)-C(16) | 1.50            | H(41)-C(24)-H(42) | 107.72    | H(38)-C(26)-C(16)-O(13) | -167.99   |
| O(19)-C(15) | 1.42            | H(41)-C(24)-C(22) | 111.64    | H(38)-C(26)-C(16)-O(25) | 12.38     |
| H(20)-C(15) | 1.10            | H(42)-C(24)-C(22) | 111.19    | H(37)-C(26)-C(16)-O(13) | -45.85    |
| H(21)-C(15) | 1.09            | O(23)-C(22)-C(24) | 125.78    | H(37)-C(26)-C(16)-O(25) | 134.52    |
| C(16)-O(13) | 1.39            | O(23)-C(22)-O(19) | 116.75    | C(22)-O(19)-C(15)-C(11) | 179.83    |
| H(14)-C(11) | 1.09            | C(24)-C(22)-O(19) | 117.46    | C(22)-O(19)-C(15)-H(21) | 61.70     |
| C(15)-C(11) | 1.52            | C(22)-O(19)-C(15) | 122.24    | C(22)-O(19)-C(15)-H(20) | -60.51    |
| C(17)-O(10) | 1.40            | O(29)-C(18)-C(30) | 128.32    | C(26)-C(16)-O(13)-C(9)  | -168.87   |

|            |      |                   |        |                         |         |
|------------|------|-------------------|--------|-------------------------|---------|
| H(12)-C(9) | 1.09 | O(29)-C(18)-O(5)  | 121.02 | O(25)-C(16)-O(13)-C(9)  | 10.79   |
| O(13)-C(9) | 1.43 | C(30)-C(18)-O(5)  | 110.66 | H(21)-C(15)-C(11)-O(3)  | 174.98  |
| C(11)-C(9) | 1.54 | O(27)-C(17)-C(28) | 125.30 | H(21)-C(15)-C(11)-C(9)  | -61.69  |
| H(8)-C(6)  | 1.09 | O(27)-C(17)-O(10) | 116.50 | H(21)-C(15)-C(11)-H(14) | 66.15   |
| O(10)-C(6) | 1.41 | C(28)-C(17)-O(10) | 118.17 | H(20)-C(15)-C(11)-O(3)  | -67.42  |
| C(9)-C(6)  | 1.54 | O(25)-C(16)-C(26) | 127.76 | H(20)-C(15)-C(11)-C(9)  | 55.91   |
| C(18)-O(5) | 1.40 | O(25)-C(16)-O(13) | 121.44 | H(20)-C(15)-C(11)-H(14) | -176.26 |
| O(5)-C(4)  | 1.42 | C(26)-C(16)-O(13) | 110.80 | O(19)-C(15)-C(11)-O(3)  | 53.57   |
| H(7)-C(4)  | 1.11 | O(19)-C(15)-H(20) | 112.01 | O(19)-C(15)-C(11)-C(9)  | 176.91  |
| C(6)-C(4)  | 1.54 | O(19)-C(15)-H(21) | 113.16 | O(19)-C(15)-C(11)-H(14) | -55.26  |
| C(11)-O(3) | 1.51 | O(19)-C(15)-C(11) | 105.55 | C(28)-C(17)-O(10)-C(6)  | 15.26   |
| H(2)-C(1)  | 1.10 | H(20)-C(15)-H(21) | 107.88 | O(27)-C(17)-O(10)-C(6)  | -166.48 |
| C(4)-C(1)  | 1.48 | H(20)-C(15)-C(11) | 109.97 | C(16)-O(13)-C(9)-C(6)   | 141.90  |
| O(3)-C(1)  | 1.26 | H(21)-C(15)-C(11) | 108.19 | C(16)-O(13)-C(9)-C(11)  | -97.01  |
|            |      | C(16)-O(13)-C(9)  | 116.41 | C(16)-O(13)-C(9)-H(12)  | 23.65   |
|            |      | H(14)-C(11)-C(15) | 110.18 | O(3)-C(11)-C(9)-C(6)    | -38.31  |
|            |      | H(14)-C(11)-C(9)  | 111.25 | O(3)-C(11)-C(9)-O(13)   | -156.09 |
|            |      | H(14)-C(11)-O(3)  | 102.03 | O(3)-C(11)-C(9)-H(12)   | 83.95   |
|            |      | C(15)-C(11)-C(9)  | 116.38 | C(15)-C(11)-C(9)-C(6)   | -157.79 |
|            |      | C(15)-C(11)-O(3)  | 104.28 | C(15)-C(11)-C(9)-O(13)  | 84.43   |
|            |      | C(9)-C(11)-O(3)   | 111.56 | C(15)-C(11)-C(9)-H(12)  | -35.53  |
|            |      | C(17)-O(10)-C(6)  | 123.35 | H(14)-C(11)-C(9)-C(6)   | 74.90   |
|            |      | H(12)-C(9)-O(13)  | 109.28 | H(14)-C(11)-C(9)-O(13)  | -42.88  |
|            |      | H(12)-C(9)-C(11)  | 110.42 | H(14)-C(11)-C(9)-H(12)  | -162.84 |
|            |      | H(12)-C(9)-C(6)   | 109.45 | C(17)-O(10)-C(6)-C(4)   | -140.19 |
|            |      | O(13)-C(9)-C(11)  | 108.85 | C(17)-O(10)-C(6)-C(9)   | 102.09  |
|            |      | O(13)-C(9)-C(6)   | 106.72 | C(17)-O(10)-C(6)-H(8)   | -20.38  |
|            |      | C(11)-C(9)-C(6)   | 112.02 | C(11)-C(9)-C(6)-C(4)    | 58.11   |
|            |      | H(8)-C(6)-O(10)   | 112.26 | C(11)-C(9)-C(6)-O(10)   | 175.03  |
|            |      | H(8)-C(6)-C(9)    | 110.15 | C(11)-C(9)-C(6)-H(8)    | -61.24  |
|            |      | H(8)-C(6)-C(4)    | 109.00 | O(13)-C(9)-C(6)-C(4)    | 177.15  |
|            |      | O(10)-C(6)-C(9)   | 109.22 | O(13)-C(9)-C(6)-O(10)   | -65.93  |
|            |      | O(10)-C(6)-C(4)   | 107.43 | O(13)-C(9)-C(6)-H(8)    | 57.80   |
|            |      | C(9)-C(6)-C(4)    | 108.69 | H(12)-C(9)-C(6)-C(4)    | -64.71  |
|            |      | C(18)-O(5)-C(4)   | 114.42 | H(12)-C(9)-C(6)-O(10)   | 52.21   |
|            |      | O(5)-C(4)-H(7)    | 107.83 | H(12)-C(9)-C(6)-H(8)    | 175.94  |
|            |      | O(5)-C(4)-C(6)    | 111.94 | C(30)-C(18)-O(5)-C(4)   | 173.86  |
|            |      | O(5)-C(4)-C(1)    | 108.54 | O(29)-C(18)-O(5)-C(4)   | -6.07   |
|            |      | H(7)-C(4)-C(6)    | 109.39 | C(18)-O(5)-C(4)-C(1)    | 119.21  |
|            |      | H(7)-C(4)-C(1)    | 106.95 | C(18)-O(5)-C(4)-C(6)    | -116.68 |
|            |      | C(6)-C(4)-C(1)    | 111.99 | C(18)-O(5)-C(4)-H(7)    | 3.69    |
|            |      | C(11)-O(3)-C(1)   | 125.27 | C(9)-C(6)-C(4)-C(1)     | -48.76  |
|            |      | H(2)-C(1)-C(4)    | 123.80 | C(9)-C(6)-C(4)-H(7)     | 69.62   |
|            |      | H(2)-C(1)-O(3)    | 112.10 | C(9)-C(6)-C(4)-O(5)     | -170.92 |
|            |      | C(4)-C(1)-O(3)    | 124.10 | O(10)-C(6)-C(4)-C(1)    | -166.82 |
|            |      |                   |        | O(10)-C(6)-C(4)-H(7)    | -48.43  |
|            |      |                   |        | O(10)-C(6)-C(4)-O(5)    | 71.02   |
|            |      |                   |        | H(8)-C(6)-C(4)-C(1)     | 71.31   |
|            |      |                   |        | H(8)-C(6)-C(4)-H(7)     | -170.31 |

|  |  |  |  |                       |         |
|--|--|--|--|-----------------------|---------|
|  |  |  |  | H(8)-C(6)-C(4)-O(5)   | -50.85  |
|  |  |  |  | C(9)-C(11)-O(3)-C(1)  | 9.78    |
|  |  |  |  | C(15)-C(11)-O(3)-C(1) | 136.20  |
|  |  |  |  | H(14)-C(11)-O(3)-C(1) | -109.08 |
|  |  |  |  | C(6)-C(4)-C(1)-O(3)   | 22.07   |
|  |  |  |  | C(6)-C(4)-C(1)-H(2)   | -158.76 |
|  |  |  |  | H(7)-C(4)-C(1)-O(3)   | -97.75  |
|  |  |  |  | H(7)-C(4)-C(1)-H(2)   | 81.42   |
|  |  |  |  | O(5)-C(4)-C(1)-O(3)   | 146.16  |
|  |  |  |  | O(5)-C(4)-C(1)-H(2)   | -34.68  |
|  |  |  |  | C(11)-O(3)-C(1)-C(4)  | -1.59   |
|  |  |  |  | C(11)-O(3)-C(1)-H(2)  | 179.16  |

Structure III-b

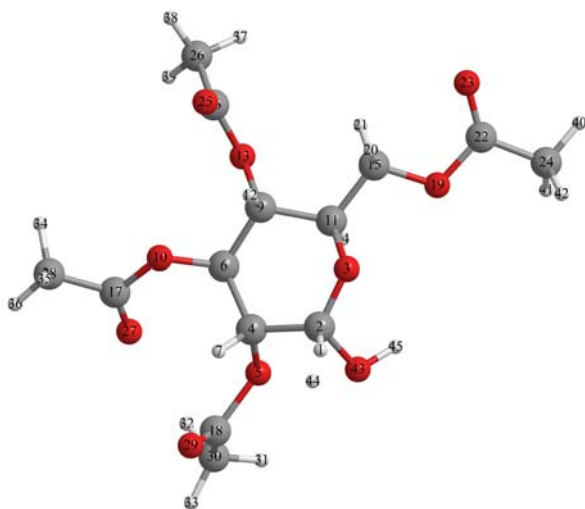

| Bond        | Bond Length (Å) | Bond Angle        | Value (°) | Dihedral Angle          | Value (°) |
|-------------|-----------------|-------------------|-----------|-------------------------|-----------|
| H(45)-O(43) | 0.98            | H(31)-C(30)-H(32) | 108.33    | H(42)-C(24)-C(22)-O(19) | -64.23    |
| H(31)-C(30) | 1.09            | H(31)-C(30)-H(33) | 110.49    | H(42)-C(24)-C(22)-O(23) | 115.43    |
| H(32)-C(30) | 1.10            | H(31)-C(30)-C(18) | 111.59    | H(41)-C(24)-C(22)-O(19) | 54.51     |
| H(33)-C(30) | 1.09            | H(32)-C(30)-H(33) | 109.95    | H(41)-C(24)-C(22)-O(23) | -125.83   |
| H(34)-C(28) | 1.10            | H(32)-C(30)-C(18) | 107.39    | H(40)-C(24)-C(22)-O(19) | 175.61    |
| H(35)-C(28) | 1.09            | H(33)-C(30)-C(18) | 109.04    | H(40)-C(24)-C(22)-O(23) | -4.72     |
| H(36)-C(28) | 1.09            | H(34)-C(28)-H(35) | 107.16    | C(24)-C(22)-O(19)-C(15) | 178.48    |
| H(37)-C(26) | 1.10            | H(34)-C(28)-H(36) | 109.90    | O(23)-C(22)-O(19)-C(15) | -1.20     |
| H(38)-C(26) | 1.09            | H(34)-C(28)-C(17) | 109.87    | H(33)-C(30)-C(18)-O(5)  | 169.36    |
| H(39)-C(26) | 1.09            | H(35)-C(28)-H(36) | 110.19    | H(33)-C(30)-C(18)-O(29) | -12.09    |
| H(40)-C(24) | 1.09            | H(35)-C(28)-C(17) | 110.16    | H(32)-C(30)-C(18)-O(5)  | -71.55    |
| H(41)-C(24) | 1.09            | H(36)-C(28)-C(17) | 109.53    | H(32)-C(30)-C(18)-O(29) | 107.00    |
| H(42)-C(24) | 1.10            | H(37)-C(26)-H(38) | 109.49    | H(31)-C(30)-C(18)-O(5)  | 47.03     |
| O(23)-C(22) | 1.21            | H(37)-C(26)-H(39) | 107.41    | H(31)-C(30)-C(18)-O(29) | -134.42   |
| C(24)-C(22) | 1.51            | H(37)-C(26)-C(16) | 109.81    | H(36)-C(28)-C(17)-O(10) | -176.26   |
| C(22)-O(19) | 1.38            | H(38)-C(26)-H(39) | 110.32    | H(36)-C(28)-C(17)-O(27) | 3.49      |
| O(29)-C(18) | 1.18            | H(38)-C(26)-C(16) | 109.27    | H(35)-C(28)-C(17)-O(10) | -54.90    |
| C(30)-C(18) | 1.48            | H(39)-C(26)-C(16) | 110.52    | H(35)-C(28)-C(17)-O(27) | 124.85    |

|             |      |                   |        |                         |         |
|-------------|------|-------------------|--------|-------------------------|---------|
| O(27)-C(17) | 1.21 | H(40)-C(24)-H(41) | 109.93 | H(34)-C(28)-C(17)-O(10) | 62.93   |
| C(28)-C(17) | 1.50 | H(40)-C(24)-H(42) | 109.50 | H(34)-C(28)-C(17)-O(27) | -117.32 |
| O(25)-C(16) | 1.20 | H(40)-C(24)-C(22) | 109.21 | H(39)-C(26)-C(16)-O(13) | 53.15   |
| C(26)-C(16) | 1.50 | H(41)-C(24)-H(42) | 107.65 | H(39)-C(26)-C(16)-O(25) | -127.66 |
| O(19)-C(15) | 1.43 | H(41)-C(24)-C(22) | 110.59 | H(38)-C(26)-C(16)-O(13) | 174.74  |
| H(20)-C(15) | 1.10 | H(42)-C(24)-C(22) | 109.93 | H(38)-C(26)-C(16)-O(25) | -6.08   |
| H(21)-C(15) | 1.09 | O(23)-C(22)-C(24) | 126.88 | H(37)-C(26)-C(16)-O(13) | -65.16  |
| C(16)-O(13) | 1.39 | O(23)-C(22)-O(19) | 122.07 | H(37)-C(26)-C(16)-O(25) | 114.02  |
| H(14)-C(11) | 1.10 | C(24)-C(22)-O(19) | 111.05 | C(22)-O(19)-C(15)-C(11) | 169.91  |
| C(15)-C(11) | 1.51 | C(22)-O(19)-C(15) | 114.35 | C(22)-O(19)-C(15)-H(21) | 50.45   |
| C(17)-O(10) | 1.37 | O(29)-C(18)-C(30) | 133.74 | C(22)-O(19)-C(15)-H(20) | -69.53  |
| H(12)-C(9)  | 1.09 | O(29)-C(18)-O(5)  | 117.76 | C(26)-C(16)-O(13)-C(9)  | -179.20 |
| O(13)-C(9)  | 1.42 | C(30)-C(18)-O(5)  | 108.49 | O(25)-C(16)-O(13)-C(9)  | 1.57    |
| C(11)-C(9)  | 1.53 | O(27)-C(17)-C(28) | 126.79 | H(21)-C(15)-C(11)-O(3)  | -172.78 |
| H(8)-C(6)   | 1.09 | O(27)-C(17)-O(10) | 121.87 | H(21)-C(15)-C(11)-C(9)  | -55.20  |
| O(10)-C(6)  | 1.43 | C(28)-C(17)-O(10) | 111.34 | H(21)-C(15)-C(11)-H(14) | 69.31   |
| C(9)-C(6)   | 1.53 | O(25)-C(16)-C(26) | 127.30 | H(20)-C(15)-C(11)-O(3)  | -52.77  |
| C(18)-O(5)  | 1.53 | O(25)-C(16)-O(13) | 122.53 | H(20)-C(15)-C(11)-C(9)  | 64.81   |
| O(5)-C(4)   | 1.47 | C(26)-C(16)-O(13) | 110.16 | H(20)-C(15)-C(11)-H(14) | -170.68 |
| H(7)-C(4)   | 1.09 | O(19)-C(15)-H(20) | 110.50 | O(19)-C(15)-C(11)-O(3)  | 67.54   |
| C(6)-C(4)   | 1.55 | O(19)-C(15)-H(21) | 110.37 | O(19)-C(15)-C(11)-C(9)  | -174.88 |
| C(11)-O(3)  | 1.46 | O(19)-C(15)-C(11) | 106.58 | O(19)-C(15)-C(11)-H(14) | -50.37  |
| O(43)-C(2)  | 1.50 | H(20)-C(15)-H(21) | 108.48 | C(28)-C(17)-O(10)-C(6)  | -173.32 |
| C(4)-C(2)   | 1.58 | H(20)-C(15)-C(11) | 110.89 | O(27)-C(17)-O(10)-C(6)  | 6.92    |
| O(3)-C(2)   | 1.36 | H(21)-C(15)-C(11) | 110.04 | C(16)-O(13)-C(9)-C(6)   | 118.61  |
| C(2)-H(1)   | 1.09 | C(16)-O(13)-C(9)  | 116.67 | C(16)-O(13)-C(9)-C(11)  | -123.43 |
|             |      | H(14)-C(11)-C(15) | 108.53 | C(16)-O(13)-C(9)-H(12)  | -2.49   |
|             |      | H(14)-C(11)-C(9)  | 110.70 | O(3)-C(11)-C(9)-C(6)    | -68.20  |
|             |      | H(14)-C(11)-O(3)  | 109.47 | O(3)-C(11)-C(9)-O(13)   | 174.43  |
|             |      | C(15)-C(11)-C(9)  | 114.90 | O(3)-C(11)-C(9)-H(12)   | 53.67   |
|             |      | C(15)-C(11)-O(3)  | 106.76 | C(15)-C(11)-C(9)-C(6)   | 173.96  |
|             |      | C(9)-C(11)-O(3)   | 106.30 | C(15)-C(11)-C(9)-O(13)  | 56.58   |
|             |      | C(17)-O(10)-C(6)  | 116.38 | C(15)-C(11)-C(9)-H(12)  | -64.17  |
|             |      | H(12)-C(9)-O(13)  | 109.56 | H(14)-C(11)-C(9)-C(6)   | 50.59   |
|             |      | H(12)-C(9)-C(11)  | 109.87 | H(14)-C(11)-C(9)-O(13)  | -66.78  |
|             |      | H(12)-C(9)-C(6)   | 111.31 | H(14)-C(11)-C(9)-H(12)  | 172.46  |
|             |      | O(13)-C(9)-C(11)  | 110.11 | C(17)-O(10)-C(6)-C(4)   | -77.38  |
|             |      | O(13)-C(9)-C(6)   | 107.51 | C(17)-O(10)-C(6)-C(9)   | 157.52  |
|             |      | C(11)-C(9)-C(6)   | 108.45 | C(17)-O(10)-C(6)-H(8)   | 40.56   |
|             |      | H(8)-C(6)-O(10)   | 109.02 | C(11)-C(9)-C(6)-C(4)    | 43.89   |
|             |      | H(8)-C(6)-C(9)    | 108.23 | C(11)-C(9)-C(6)-O(10)   | 167.30  |
|             |      | H(8)-C(6)-C(4)    | 107.20 | C(11)-C(9)-C(6)-H(8)    | -75.23  |
|             |      | O(10)-C(6)-C(9)   | 107.22 | O(13)-C(9)-C(6)-C(4)    | 162.92  |
|             |      | O(10)-C(6)-C(4)   | 111.14 | O(13)-C(9)-C(6)-O(10)   | -73.67  |
|             |      | C(9)-C(6)-C(4)    | 113.92 | O(13)-C(9)-C(6)-H(8)    | 43.80   |
|             |      | C(18)-O(5)-C(4)   | 117.05 | H(12)-C(9)-C(6)-C(4)    | -77.09  |
|             |      | H(45)-O(43)-C(2)  | 109.36 | H(12)-C(9)-C(6)-O(10)   | 46.32   |
|             |      | O(5)-C(4)-H(7)    | 107.57 | H(12)-C(9)-C(6)-H(8)    | 163.79  |
|             |      | O(5)-C(4)-C(6)    | 108.28 | C(30)-C(18)-O(5)-C(4)   | 161.93  |

|  |                 |        |                       |         |
|--|-----------------|--------|-----------------------|---------|
|  | O(5)-C(4)-C(2)  | 104.41 | O(29)-C(18)-O(5)-C(4) | -16.88  |
|  | H(7)-C(4)-C(6)  | 110.24 | C(18)-O(5)-C(4)-C(2)  | 122.03  |
|  | H(7)-C(4)-C(2)  | 108.78 | C(18)-O(5)-C(4)-C(6)  | -112.57 |
|  | C(6)-C(4)-C(2)  | 117.04 | C(18)-O(5)-C(4)-H(7)  | 6.56    |
|  | C(11)-O(3)-C(2) | 118.04 | C(9)-C(6)-C(4)-C(2)   | -12.46  |
|  | O(43)-C(2)-C(4) | 103.31 | C(9)-C(6)-C(4)-H(7)   | 112.53  |
|  | O(43)-C(2)-O(3) | 111.29 | C(9)-C(6)-C(4)-O(5)   | -130.04 |
|  | O(43)-C(2)-H(1) | 104.56 | O(10)-C(6)-C(4)-C(2)  | -133.72 |
|  | C(4)-C(2)-O(3)  | 117.06 | O(10)-C(6)-C(4)-H(7)  | -8.72   |
|  | C(4)-C(2)-H(1)  | 111.74 | O(10)-C(6)-C(4)-O(5)  | 108.70  |
|  | O(3)-C(2)-H(1)  | 108.13 | H(8)-C(6)-C(4)-C(2)   | 107.24  |
|  |                 |        | H(8)-C(6)-C(4)-H(7)   | -127.76 |
|  |                 |        | H(8)-C(6)-C(4)-O(5)   | -10.33  |
|  |                 |        | C(9)-C(11)-O(3)-C(2)  | 64.05   |
|  |                 |        | C(15)-C(11)-O(3)-C(2) | -172.85 |
|  |                 |        | H(14)-C(11)-O(3)-C(2) | -55.55  |
|  |                 |        | H(45)-O(43)-C(2)-H(1) | -115.47 |
|  |                 |        | H(45)-O(43)-C(2)-O(3) | 1.04    |
|  |                 |        | H(45)-O(43)-C(2)-C(4) | 127.48  |
|  |                 |        | C(6)-C(4)-C(2)-H(1)   | 129.59  |
|  |                 |        | C(6)-C(4)-C(2)-O(3)   | 4.14    |
|  |                 |        | C(6)-C(4)-C(2)-O(43)  | -118.54 |
|  |                 |        | H(7)-C(4)-C(2)-H(1)   | 3.86    |
|  |                 |        | H(7)-C(4)-C(2)-O(3)   | -121.59 |
|  |                 |        | H(7)-C(4)-C(2)-O(43)  | 115.73  |
|  |                 |        | O(5)-C(4)-C(2)-H(1)   | -110.76 |
|  |                 |        | O(5)-C(4)-C(2)-O(3)   | 123.79  |
|  |                 |        | O(5)-C(4)-C(2)-O(43)  | 1.11    |
|  |                 |        | C(11)-O(3)-C(2)-H(1)  | -158.31 |
|  |                 |        | C(11)-O(3)-C(2)-C(4)  | -31.07  |
|  |                 |        | C(11)-O(3)-C(2)-O(43) | 87.39   |

Structure IV-a

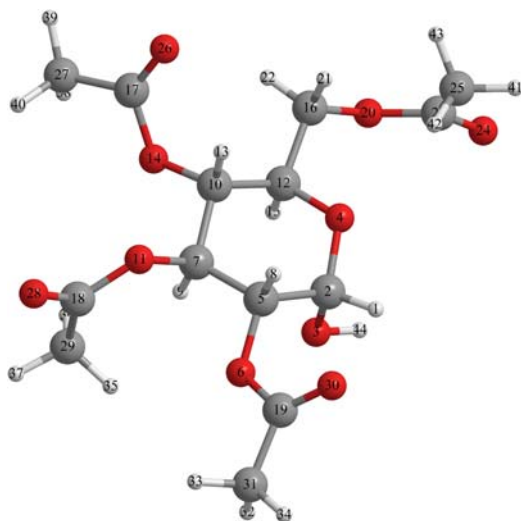

| Bond        | Bond Length (Å) | Bond Angle        | Value (°) | Dihedral Angle          | Value (°) |
|-------------|-----------------|-------------------|-----------|-------------------------|-----------|
| H(32)-C(31) | 1.09            | H(32)-C(31)-H(33) | 107.54    | H(43)-C(25)-C(23)-O(20) | -55.72    |
| H(33)-C(31) | 1.10            | H(32)-C(31)-H(34) | 110.08    | H(43)-C(25)-C(23)-O(24) | 121.72    |
| H(34)-C(31) | 1.09            | H(32)-C(31)-C(19) | 110.17    | H(42)-C(25)-C(23)-O(20) | 64.92     |
| H(35)-C(29) | 1.09            | H(33)-C(31)-H(34) | 109.75    | H(42)-C(25)-C(23)-O(24) | -117.64   |
| H(36)-C(29) | 1.10            | H(33)-C(31)-C(19) | 109.91    | H(41)-C(25)-C(23)-O(20) | -175.26   |
| H(37)-C(29) | 1.09            | H(34)-C(31)-C(19) | 109.37    | H(41)-C(25)-C(23)-O(24) | 2.18      |
| H(38)-C(27) | 1.09            | H(35)-C(29)-H(36) | 108.07    | C(25)-C(23)-O(20)-C(16) | -15.91    |
| H(39)-C(27) | 1.09            | H(35)-C(29)-H(37) | 109.58    | O(24)-C(23)-O(20)-C(16) | 166.51    |
| H(40)-C(27) | 1.10            | H(35)-C(29)-C(18) | 111.34    | H(34)-C(31)-C(19)-O(6)  | 176.93    |
| H(41)-C(25) | 1.09            | H(36)-C(29)-H(37) | 109.05    | H(34)-C(31)-C(19)-O(30) | -3.18     |
| H(42)-C(25) | 1.09            | H(36)-C(29)-C(18) | 111.28    | H(33)-C(31)-C(19)-O(6)  | -62.52    |
| H(43)-C(25) | 1.10            | H(37)-C(29)-C(18) | 107.50    | H(33)-C(31)-C(19)-O(30) | 117.37    |
| O(24)-C(23) | 1.21            | H(38)-C(27)-H(39) | 110.42    | H(32)-C(31)-C(19)-O(6)  | 55.81     |
| C(25)-C(23) | 1.52            | H(38)-C(27)-H(40) | 107.59    | H(32)-C(31)-C(19)-O(30) | -124.30   |
| C(23)-O(20) | 1.37            | H(38)-C(27)-C(17) | 110.71    | H(37)-C(29)-C(18)-O(11) | 179.23    |
| O(30)-C(19) | 1.21            | H(39)-C(27)-H(40) | 109.32    | H(37)-C(29)-C(18)-O(28) | -1.31     |
| C(31)-C(19) | 1.51            | H(39)-C(27)-C(17) | 109.43    | H(36)-C(29)-C(18)-O(11) | -61.42    |
| O(28)-C(18) | 1.21            | H(40)-C(27)-C(17) | 109.33    | H(36)-C(29)-C(18)-O(28) | 118.04    |
| C(29)-C(18) | 1.52            | H(41)-C(25)-H(42) | 109.51    | H(35)-C(29)-C(18)-O(11) | 59.21     |
| O(26)-C(17) | 1.21            | H(41)-C(25)-H(43) | 109.11    | H(35)-C(29)-C(18)-O(28) | -121.33   |
| C(27)-C(17) | 1.51            | H(41)-C(25)-C(23) | 107.59    | H(40)-C(27)-C(17)-O(14) | 71.20     |
| O(20)-C(16) | 1.43            | H(42)-C(25)-H(43) | 108.18    | H(40)-C(27)-C(17)-O(26) | -108.63   |
| H(21)-C(16) | 1.09            | H(42)-C(25)-C(23) | 111.05    | H(39)-C(27)-C(17)-O(14) | -169.09   |
| H(22)-C(16) | 1.09            | H(43)-C(25)-C(23) | 111.38    | H(39)-C(27)-C(17)-O(26) | 11.07     |
| C(17)-O(14) | 1.37            | O(24)-C(23)-C(25) | 123.50    | H(38)-C(27)-C(17)-O(14) | -47.15    |
| H(15)-C(12) | 1.10            | O(24)-C(23)-O(20) | 117.81    | H(38)-C(27)-C(17)-O(26) | 133.01    |
| C(16)-C(12) | 1.53            | C(25)-C(23)-O(20) | 118.64    | C(23)-O(20)-C(16)-C(12) | -95.26    |
| C(18)-O(11) | 1.37            | C(23)-O(20)-C(16) | 122.95    | C(23)-O(20)-C(16)-H(22) | 146.20    |
| H(13)-C(10) | 1.09            | O(30)-C(19)-C(31) | 126.12    | C(23)-O(20)-C(16)-H(21) | 28.16     |
| O(14)-C(10) | 1.44            | O(30)-C(19)-O(6)  | 123.19    | C(27)-C(17)-O(14)-C(10) | -171.81   |
| C(12)-C(10) | 1.54            | C(31)-C(19)-O(6)  | 110.69    | O(26)-C(17)-O(14)-C(10) | 8.03      |
| H(9)-C(7)   | 1.09            | O(28)-C(18)-C(29) | 123.54    | H(22)-C(16)-C(12)-O(4)  | -177.17   |
| O(11)-C(7)  | 1.43            | O(28)-C(18)-O(11) | 117.71    | H(22)-C(16)-C(12)-C(10) | -57.23    |
| C(10)-C(7)  | 1.53            | C(29)-C(18)-O(11) | 118.74    | H(22)-C(16)-C(12)-H(15) | 64.96     |
| C(19)-O(6)  | 1.36            | O(26)-C(17)-C(27) | 125.98    | H(21)-C(16)-C(12)-O(4)  | -57.62    |
| O(6)-C(5)   | 1.44            | O(26)-C(17)-O(14) | 123.45    | H(21)-C(16)-C(12)-C(10) | 62.32     |
| H(8)-C(5)   | 1.09            | C(27)-C(17)-O(14) | 110.57    | H(21)-C(16)-C(12)-H(15) | -175.50   |
| C(7)-C(5)   | 1.53            | O(20)-C(16)-H(21) | 112.54    | O(20)-C(16)-C(12)-O(4)  | 66.85     |
| C(12)-O(4)  | 1.43            | O(20)-C(16)-H(22) | 106.01    | O(20)-C(16)-C(12)-C(10) | -173.21   |
| H(44)-O(3)  | 0.97            | O(20)-C(16)-C(12) | 109.19    | O(20)-C(16)-C(12)-H(15) | -51.02    |
| O(3)-C(2)   | 1.40            | H(21)-C(16)-H(22) | 108.16    | C(29)-C(18)-O(11)-C(7)  | -2.33     |
| C(5)-C(2)   | 1.54            | H(21)-C(16)-C(12) | 110.75    | O(28)-C(18)-O(11)-C(7)  | 178.18    |
| O(4)-C(2)   | 1.42            | H(22)-C(16)-C(12) | 110.06    | C(17)-O(14)-C(10)-C(7)  | 138.56    |
| C(2)-H(1)   | 1.09            | C(17)-O(14)-C(10) | 117.30    | C(17)-O(14)-C(10)-C(12) | -101.74   |
|             |                 | H(15)-C(12)-C(16) | 108.46    | C(17)-O(14)-C(10)-H(13) | 19.99     |
|             |                 | H(15)-C(12)-C(10) | 109.30    | O(4)-C(12)-C(10)-C(7)   | -55.64    |
|             |                 | H(15)-C(12)-O(4)  | 109.61    | O(4)-C(12)-C(10)-O(14)  | -172.76   |

|  |  |                   |        |                         |         |
|--|--|-------------------|--------|-------------------------|---------|
|  |  | C(16)-C(12)-C(10) | 114.27 | O(4)-C(12)-C(10)-H(13)  | 66.24   |
|  |  | C(16)-C(12)-O(4)  | 106.46 | C(16)-C(12)-C(10)-C(7)  | -174.34 |
|  |  | C(10)-C(12)-O(4)  | 108.65 | C(16)-C(12)-C(10)-O(14) | 68.54   |
|  |  | C(18)-O(11)-C(7)  | 123.57 | C(16)-C(12)-C(10)-H(13) | -52.46  |
|  |  | H(13)-C(10)-O(14) | 109.07 | H(15)-C(12)-C(10)-C(7)  | 63.93   |
|  |  | H(13)-C(10)-C(12) | 110.32 | H(15)-C(12)-C(10)-O(14) | -53.19  |
|  |  | H(13)-C(10)-C(7)  | 110.14 | H(15)-C(12)-C(10)-H(13) | -174.19 |
|  |  | O(14)-C(10)-C(12) | 110.96 | C(18)-O(11)-C(7)-C(5)   | -109.99 |
|  |  | O(14)-C(10)-C(7)  | 105.99 | C(18)-O(11)-C(7)-C(10)  | 129.72  |
|  |  | C(12)-C(10)-C(7)  | 110.26 | C(18)-O(11)-C(7)-H(9)   | 10.51   |
|  |  | H(9)-C(7)-O(11)   | 111.51 | C(12)-C(10)-C(7)-C(5)   | 52.29   |
|  |  | H(9)-C(7)-C(10)   | 108.77 | C(12)-C(10)-C(7)-O(11)  | 171.41  |
|  |  | H(9)-C(7)-C(5)    | 109.09 | C(12)-C(10)-C(7)-H(9)   | -67.65  |
|  |  | O(11)-C(7)-C(10)  | 107.61 | O(14)-C(10)-C(7)-C(5)   | 172.45  |
|  |  | O(11)-C(7)-C(5)   | 109.01 | O(14)-C(10)-C(7)-O(11)  | -68.42  |
|  |  | C(10)-C(7)-C(5)   | 110.86 | O(14)-C(10)-C(7)-H(9)   | 52.51   |
|  |  | C(19)-O(6)-C(5)   | 116.60 | H(13)-C(10)-C(7)-C(5)   | -69.70  |
|  |  | O(6)-C(5)-H(8)    | 109.16 | H(13)-C(10)-C(7)-O(11)  | 49.43   |
|  |  | O(6)-C(5)-C(7)    | 106.41 | H(13)-C(10)-C(7)-H(9)   | 170.37  |
|  |  | O(6)-C(5)-C(2)    | 112.49 | C(31)-C(19)-O(6)-C(5)   | 176.64  |
|  |  | H(8)-C(5)-C(7)    | 110.07 | O(30)-C(19)-O(6)-C(5)   | -3.25   |
|  |  | H(8)-C(5)-C(2)    | 107.91 | C(19)-O(6)-C(5)-C(2)    | 77.94   |
|  |  | C(7)-C(5)-C(2)    | 110.79 | C(19)-O(6)-C(5)-C(7)    | -160.56 |
|  |  | C(12)-O(4)-C(2)   | 114.69 | C(19)-O(6)-C(5)-H(8)    | -41.80  |
|  |  | H(44)-O(3)-C(2)   | 107.65 | C(10)-C(7)-C(5)-C(2)    | -51.98  |
|  |  | O(3)-C(2)-C(5)    | 108.11 | C(10)-C(7)-C(5)-H(8)    | 67.29   |
|  |  | O(3)-C(2)-O(4)    | 112.80 | C(10)-C(7)-C(5)-O(6)    | -174.55 |
|  |  | O(3)-C(2)-H(1)    | 112.05 | O(11)-C(7)-C(5)-C(2)    | -170.25 |
|  |  | C(5)-C(2)-O(4)    | 108.80 | O(11)-C(7)-C(5)-H(8)    | -50.99  |
|  |  | C(5)-C(2)-H(1)    | 110.39 | O(11)-C(7)-C(5)-O(6)    | 67.17   |
|  |  | O(4)-C(2)-H(1)    | 104.64 | H(9)-C(7)-C(5)-C(2)     | 67.77   |
|  |  |                   |        | H(9)-C(7)-C(5)-H(8)     | -172.97 |
|  |  |                   |        | H(9)-C(7)-C(5)-O(6)     | -54.80  |
|  |  |                   |        | C(10)-C(12)-O(4)-C(2)   | 63.17   |
|  |  |                   |        | C(16)-C(12)-O(4)-C(2)   | -173.32 |
|  |  |                   |        | H(15)-C(12)-O(4)-C(2)   | -56.20  |
|  |  |                   |        | H(44)-O(3)-C(2)-H(1)    | -54.16  |
|  |  |                   |        | H(44)-O(3)-C(2)-O(4)    | 63.62   |
|  |  |                   |        | H(44)-O(3)-C(2)-C(5)    | -176.03 |
|  |  |                   |        | C(7)-C(5)-C(2)-H(1)     | 169.37  |
|  |  |                   |        | C(7)-C(5)-C(2)-O(4)     | 55.08   |
|  |  |                   |        | C(7)-C(5)-C(2)-O(3)     | -67.74  |
|  |  |                   |        | H(8)-C(5)-C(2)-H(1)     | 48.81   |
|  |  |                   |        | H(8)-C(5)-C(2)-O(4)     | -65.48  |
|  |  |                   |        | H(8)-C(5)-C(2)-O(3)     | 171.70  |
|  |  |                   |        | O(6)-C(5)-C(2)-H(1)     | -71.66  |
|  |  |                   |        | O(6)-C(5)-C(2)-O(4)     | 174.05  |
|  |  |                   |        | O(6)-C(5)-C(2)-O(3)     | 51.23   |
|  |  |                   |        | C(12)-O(4)-C(2)-H(1)    | 179.37  |

|  |  |  |  |                      |        |
|--|--|--|--|----------------------|--------|
|  |  |  |  | C(12)-O(4)-C(2)-C(5) | -62.64 |
|  |  |  |  | C(12)-O(4)-C(2)-O(3) | 57.31  |

Structure IV-b

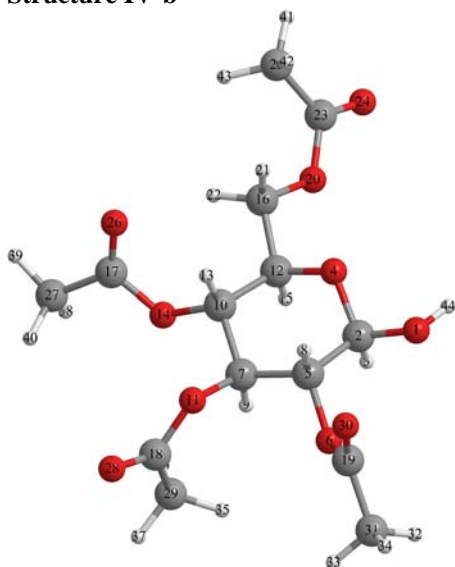

| Bond        | Bond Length (Å) | Bond Angle        | Value (°) | Dihedral Angle          | Value (°) |
|-------------|-----------------|-------------------|-----------|-------------------------|-----------|
| H(32)-C(31) | 1.10            | H(32)-C(31)-H(33) | 107.53    | H(43)-C(25)-C(23)-O(20) | -54.67    |
| H(33)-C(31) | 1.09            | H(32)-C(31)-H(34) | 109.85    | H(43)-C(25)-C(23)-O(24) | 125.98    |
| H(34)-C(31) | 1.09            | H(32)-C(31)-C(19) | 109.85    | H(42)-C(25)-C(23)-O(20) | 65.30     |
| H(35)-C(29) | 1.09            | H(33)-C(31)-H(34) | 109.91    | H(42)-C(25)-C(23)-O(24) | -114.05   |
| H(36)-C(29) | 1.10            | H(33)-C(31)-C(19) | 110.37    | H(41)-C(25)-C(23)-O(20) | -175.37   |
| H(37)-C(29) | 1.09            | H(34)-C(31)-C(19) | 109.31    | H(41)-C(25)-C(23)-O(24) | 5.29      |
| H(38)-C(27) | 1.09            | H(35)-C(29)-H(36) | 108.11    | C(25)-C(23)-O(20)-C(16) | 3.37      |
| H(39)-C(27) | 1.09            | H(35)-C(29)-H(37) | 109.49    | O(24)-C(23)-O(20)-C(16) | -177.24   |
| H(40)-C(27) | 1.10            | H(35)-C(29)-C(18) | 111.47    | H(34)-C(31)-C(19)-O(6)  | -177.80   |
| H(41)-C(25) | 1.09            | H(36)-C(29)-H(37) | 109.05    | H(34)-C(31)-C(19)-O(30) | 2.12      |
| H(42)-C(25) | 1.10            | H(36)-C(29)-C(18) | 111.22    | H(33)-C(31)-C(19)-O(6)  | -56.81    |
| H(43)-C(25) | 1.10            | H(37)-C(29)-C(18) | 107.47    | H(33)-C(31)-C(19)-O(30) | 123.11    |
| O(24)-C(23) | 1.21            | H(38)-C(27)-H(40) | 110.47    | H(32)-C(31)-C(19)-O(6)  | 61.60     |
| C(25)-C(23) | 1.52            | H(38)-C(27)-C(17) | 110.86    | H(32)-C(31)-C(19)-O(30) | -118.48   |
| C(23)-O(20) | 1.37            | H(39)-C(27)-H(40) | 109.15    | H(37)-C(29)-C(18)-O(11) | 175.90    |
| O(30)-C(19) | 1.20            | H(39)-C(27)-C(17) | 109.43    | H(37)-C(29)-C(18)-O(28) | -3.51     |
| C(31)-C(19) | 1.51            | H(40)-C(27)-C(17) | 109.21    | H(36)-C(29)-C(18)-O(11) | -64.81    |
| O(28)-C(18) | 1.20            | H(41)-C(25)-H(42) | 108.98    | H(36)-C(29)-C(18)-O(28) | 115.78    |
| C(29)-C(18) | 1.52            | H(41)-C(25)-C(23) | 108.03    | H(35)-C(29)-C(18)-O(11) | 55.91     |
| O(26)-C(17) | 1.21            | H(41)-C(25)-H(43) | 109.50    | H(35)-C(29)-C(18)-O(28) | -123.50   |
| C(27)-C(17) | 1.51            | H(42)-C(25)-C(23) | 110.85    | H(40)-C(27)-C(17)-O(14) | 73.37     |
| O(20)-C(16) | 1.43            | H(42)-C(25)-H(43) | 107.41    | H(40)-C(27)-C(17)-O(26) | -106.37   |
| H(21)-C(16) | 1.09            | H(42)-C(25)-C(23) | 110.85    | H(39)-C(27)-C(17)-O(14) | -167.20   |
| H(22)-C(16) | 1.09            | H(43)-C(25)-C(23) | 112.05    | H(39)-C(27)-C(17)-O(26) | 13.05     |
| C(17)-O(14) | 1.37            | O(24)-C(23)-C(25) | 123.76    | H(38)-C(27)-C(17)-O(14) | -45.11    |
| H(15)-C(12) | 1.10            | O(24)-C(23)-O(20) | 118.33    | H(38)-C(27)-C(17)-O(26) | 135.15    |
| C(16)-C(12) | 1.52            | C(25)-C(23)-O(20) | 117.90    | C(23)-O(20)-C(16)-C(12) | -169.76   |



|             |      |                   |        |                         |         |
|-------------|------|-------------------|--------|-------------------------|---------|
| C(18)-O(11) | 1.37 | C(23)-O(20)-C(16) | 121.67 | C(23)-O(20)-C(16)-H(22) | 70.24   |
| H(13)-C(10) | 1.09 | O(30)-C(19)-C(31) | 126.06 | C(23)-O(20)-C(16)-H(21) | -50.80  |
| O(14)-C(10) | 1.44 | O(30)-C(19)-O(6)  | 124.00 | C(27)-C(17)-O(14)-C(10) | -170.57 |
| C(12)-C(10) | 1.54 | C(31)-C(19)-O(6)  | 109.94 | O(26)-C(17)-O(14)-C(10) | 9.18    |
| H(9)-C(7)   | 1.09 | O(28)-C(18)-C(29) | 123.39 | H(22)-C(16)-C(12)-O(4)  | -169.30 |
| O(11)-C(7)  | 1.43 | O(28)-C(18)-O(11) | 117.86 | H(22)-C(16)-C(12)-C(10) | -49.93  |
| C(10)-C(7)  | 1.53 | C(29)-C(18)-O(11) | 118.75 | H(22)-C(16)-C(12)-H(15) | 71.68   |
| C(19)-O(6)  | 1.37 | O(26)-C(17)-C(27) | 125.96 | H(21)-C(16)-C(12)-O(4)  | -49.77  |
| O(6)-C(5)   | 1.43 | O(26)-C(17)-O(14) | 123.41 | H(21)-C(16)-C(12)-C(10) | 69.60   |
| H(8)-C(5)   | 1.09 | C(27)-C(17)-O(14) | 110.63 | H(21)-C(16)-C(12)-H(15) | -168.79 |
| C(7)-C(5)   | 1.53 | O(20)-C(16)-H(21) | 111.64 | O(20)-C(16)-C(12)-O(4)  | 70.86   |
| C(12)-O(4)  | 1.42 | O(20)-C(16)-H(22) | 110.30 | O(20)-C(16)-C(12)-C(10) | -169.77 |
| H(3)-C(2)   | 1.11 | O(20)-C(16)-C(12) | 106.53 | O(20)-C(16)-C(12)-H(15) | -48.16  |
| C(5)-C(2)   | 1.53 | H(21)-C(16)-H(22) | 108.76 | C(29)-C(18)-O(11)-C(7)  | 6.29    |
| O(4)-C(2)   | 1.42 | H(21)-C(16)-C(12) | 109.06 | O(28)-C(18)-O(11)-C(7)  | -174.27 |
| C(2)-O(1)   | 1.38 | H(22)-C(16)-C(12) | 110.54 | C(17)-O(14)-C(10)-C(7)  | 138.38  |
| H(44)-O(1)  | 0.97 | C(17)-O(14)-C(10) | 117.53 | C(17)-O(14)-C(10)-C(12) | -102.15 |
|             |      | H(15)-C(12)-C(16) | 108.47 | C(17)-O(14)-C(10)-H(13) | 19.76   |
|             |      | H(15)-C(12)-C(10) | 109.11 | O(4)-C(12)-C(10)-C(7)   | -55.53  |
|             |      | H(15)-C(12)-O(4)  | 110.39 | O(4)-C(12)-C(10)-O(14)  | -172.34 |
|             |      | C(16)-C(12)-C(10) | 113.76 | O(4)-C(12)-C(10)-H(13)  | 66.28   |
|             |      | C(16)-C(12)-O(4)  | 106.86 | C(16)-C(12)-C(10)-C(7)  | -174.12 |
|             |      | C(10)-C(12)-O(4)  | 108.22 | C(16)-C(12)-C(10)-O(14) | 69.07   |
|             |      | C(18)-O(11)-C(7)  | 123.65 | C(16)-C(12)-C(10)-H(13) | -52.31  |
|             |      | H(13)-C(10)-O(14) | 109.22 | H(15)-C(12)-C(10)-C(7)  | 64.62   |
|             |      | H(13)-C(10)-C(12) | 110.15 | H(15)-C(12)-C(10)-O(14) | -52.19  |
|             |      | H(13)-C(10)-C(7)  | 110.30 | H(15)-C(12)-C(10)-H(13) | -173.57 |
|             |      | O(14)-C(10)-C(12) | 111.42 | C(18)-O(11)-C(7)-C(5)   | -121.57 |
|             |      | O(14)-C(10)-C(7)  | 105.62 | C(18)-O(11)-C(7)-C(10)  | 116.41  |
|             |      | C(12)-C(10)-C(7)  | 110.04 | C(18)-O(11)-C(7)-H(9)   | -2.18   |
|             |      | H(9)-C(7)-O(11)   | 110.92 | C(12)-C(10)-C(7)-C(5)   | 50.99   |
|             |      | H(9)-C(7)-C(10)   | 108.22 | C(12)-C(10)-C(7)-O(11)  | 171.27  |
|             |      | H(9)-C(7)-C(5)    | 108.44 | C(12)-C(10)-C(7)-H(9)   | -68.43  |
|             |      | O(11)-C(7)-C(10)  | 108.27 | O(14)-C(10)-C(7)-C(5)   | 171.37  |
|             |      | O(11)-C(7)-C(5)   | 109.09 | O(14)-C(10)-C(7)-O(11)  | -68.35  |
|             |      | C(10)-C(7)-C(5)   | 111.91 | O(14)-C(10)-C(7)-H(9)   | 51.94   |
|             |      | C(19)-O(6)-C(5)   | 117.31 | H(13)-C(10)-C(7)-C(5)   | -70.73  |
|             |      | O(6)-C(5)-H(8)    | 109.63 | H(13)-C(10)-C(7)-O(11)  | 49.55   |
|             |      | O(6)-C(5)-C(7)    | 107.54 | H(13)-C(10)-C(7)-H(9)   | 169.85  |
|             |      | O(6)-C(5)-C(2)    | 109.59 | C(31)-C(19)-O(6)-C(5)   | -177.05 |
|             |      | H(8)-C(5)-C(7)    | 111.30 | O(30)-C(19)-O(6)-C(5)   | 3.03    |
|             |      | H(8)-C(5)-C(2)    | 109.02 | C(19)-O(6)-C(5)-C(2)    | 111.50  |
|             |      | C(7)-C(5)-C(2)    | 109.74 | C(19)-O(6)-C(5)-C(7)    | -129.26 |
|             |      | C(12)-O(4)-C(2)   | 113.67 | C(19)-O(6)-C(5)-H(8)    | -8.12   |
|             |      | H(3)-C(2)-C(5)    | 110.02 | C(10)-C(7)-C(5)-C(2)    | -50.91  |
|             |      | H(3)-C(2)-O(4)    | 108.67 | C(10)-C(7)-C(5)-H(8)    | 69.85   |
|             |      | H(3)-C(2)-O(1)    | 111.90 | C(10)-C(7)-C(5)-O(6)    | -170.05 |
|             |      | C(5)-C(2)-O(4)    | 108.89 | O(11)-C(7)-C(5)-C(2)    | -170.71 |
|             |      | C(5)-C(2)-O(1)    | 108.54 | O(11)-C(7)-C(5)-H(8)    | -49.94  |

|  |  |                 |        |                       |         |
|--|--|-----------------|--------|-----------------------|---------|
|  |  | O(4)-C(2)-O(1)  | 108.77 | O(11)-C(7)-C(5)-O(6)  | 70.15   |
|  |  | C(2)-O(1)-H(44) | 107.79 | H(9)-C(7)-C(5)-C(2)   | 68.38   |
|  |  |                 |        | H(9)-C(7)-C(5)-H(8)   | -170.85 |
|  |  |                 |        | H(9)-C(7)-C(5)-O(6)   | -50.76  |
|  |  |                 |        | C(10)-C(12)-O(4)-C(2) | 65.06   |
|  |  |                 |        | C(16)-C(12)-O(4)-C(2) | -172.04 |
|  |  |                 |        | H(15)-C(12)-O(4)-C(2) | -54.28  |
|  |  |                 |        | C(7)-C(5)-C(2)-O(1)   | 174.03  |
|  |  |                 |        | C(7)-C(5)-C(2)-O(4)   | 55.77   |
|  |  |                 |        | C(7)-C(5)-C(2)-H(3)   | -63.23  |
|  |  |                 |        | H(8)-C(5)-C(2)-O(1)   | 51.90   |
|  |  |                 |        | H(8)-C(5)-C(2)-O(4)   | -66.36  |
|  |  |                 |        | H(8)-C(5)-C(2)-H(3)   | 174.64  |
|  |  |                 |        | O(6)-C(5)-C(2)-O(1)   | -68.09  |
|  |  |                 |        | O(6)-C(5)-C(2)-O(4)   | 173.65  |
|  |  |                 |        | O(6)-C(5)-C(2)-H(3)   | 54.65   |
|  |  |                 |        | C(12)-O(4)-C(2)-O(1)  | 176.33  |
|  |  |                 |        | C(12)-O(4)-C(2)-C(5)  | -65.55  |
|  |  |                 |        | C(12)-O(4)-C(2)-H(3)  | 54.29   |
|  |  |                 |        | O(4)-C(2)-O(1)-H(44)  | -61.69  |
|  |  |                 |        | C(5)-C(2)-O(1)-H(44)  | 179.98  |
|  |  |                 |        | H(3)-C(2)-O(1)-H(44)  | 58.38   |
